# Supplementary material for: A radical anti-Markovnikov addition of alkyl nitriles to simple alkenes via selective sp3 C–H bond functionalization
Source: Royal Society of Chemistry journal article supplement (doi:10.1039/c5cc02968f), 2015-01-01

## Supporting Information

# A Radical Anti-Markovnikov Addition of Alkyl Nitriles to Simple Alkenes via Selective $sp^3$ C-H Bond Functionalization

Zejiang Li, Yingxia Xiao, Zhong-Quan Liu\*

State Key Laboratory of Applied Organic Chemistry, Lanzhou University, Lanzhou 730000, P.  
R. China

E-mail: [liuzhq@lzu.edu.cn](mailto:liuzhq@lzu.edu.cn)

|                                                                                        |       |
|----------------------------------------------------------------------------------------|-------|
| <b>General Information</b> .....                                                       | 1     |
| <b>Optimization of the typical reaction conditions</b> .....                           | 2     |
| <b>Typical procedure</b> .....                                                         | 3     |
| <b>Substrate scope</b> .....                                                           | 3-5   |
| <b>Competing Kinetic Isotope Effect (KIE) Experiment</b> .....                         | 5-6   |
| <b>The Experiment by Addition of TEMPO</b> .....                                       | 7-8   |
| <b>Physical data and references for the following products</b> .....                   | 9-18  |
| <b>Copies of the <math>^1\text{H}</math> NMR, <math>^{13}\text{C}</math> NMR</b> ..... | 19-41 |

### General Information

$^1\text{H}$  and  $^{13}\text{C}$  NMR spectra were recorded on a Bruker advance III 400 spectrometer in  $\text{CDCl}_3$  with TMS as internal standard. Mass spectra were determined on a Hewlett Packard 5988A spectrometer by direct inlet at 70 eV. High-resolution mass spectral analysis (HRMS) data were measured on a Bruker Apex II. Element analysis (EA) data were measured on a Vario EL. Electron paramagnetic resonance (EPR) data were measured on a Bruker A300 EPR spectrometer (X-band). All products were identified by  $^1\text{H}$  and  $^{13}\text{C}$  NMR,  $^{31}\text{P}$  NMR, MS, HRMS, and Element Analysis. The starting materials were purchased from Energy Chemicals, Alfa Aesar, Acros Organics, J&K Chemicals, Adamas, or Aldrich and used without further purification.

## Optimization of the typical reaction conditions

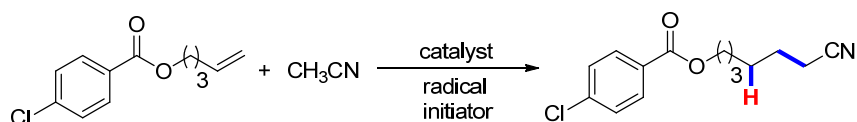

| Entry    | CH <sub>3</sub> CN(mL) | catalyst (mol %)      | Oxidant (equiv) | T ( °C)    | t (h)     | Yield (%) |
|----------|------------------------|-----------------------|-----------------|------------|-----------|-----------|
| 1        | 5                      | CuI(10)               | DCP(3)          | 110        | 2         | 36        |
| 2        | 5                      | CuI (10)              | DCP(3)          | 110        | 5         | 80        |
| 3        | 5                      | CuI (10)              | DCP(3)          | 110        | 7         | 86        |
| <b>4</b> | <b>5</b>               | <b>CuI (10)</b>       | <b>DCP(3)</b>   | <b>110</b> | <b>10</b> | <b>90</b> |
| 5        | 5                      | CuI (10)              | DCP(3)          | 110        | 12        | 89        |
| 6        | 5                      | CuI (10)              | DCP(3)          | 110        | 15        | 86        |
| 7        | 5                      | CuI (10)              | DCP(3)          | 110        | 24        | 80        |
| 8        | 5                      | CuI (10)              | DTBP(3)         | 110        | 10        | Trace     |
| 9        | 5                      | CuI (10)              | BPO(3)          | 110        | 10        | 10        |
| 10       | 5                      | CuI (10)              | TBHP(3)         | 110        | 10        | Trace     |
| 11       | 5                      | CuI(10)               | TBPB(3)         | 110        | 10        | 22        |
| 12       | 5                      | CuI(10)               | TBCP(3)         | 110        | 10        | 11        |
| 13       | 5                      | CuI(10)               | DCP(3)          | 50         | 10        | Trace     |
| 14       | 5                      | CuI(10)               | DCP(3)          | 80         | 10        | Trace     |
| 15       | 5                      | CuI(10)               | DCP(0.2)        | 110        | 10        | Trace     |
| 16       | 5                      | CuI(10)               | DCP(0.5)        | 110        | 10        | Trace     |
| 17       | 5                      | CuI(10)               | DCP(1)          | 110        | 10        | 22        |
| 18       | 5                      | CuI(10)               | DCP(2)          | 110        | 10        | 80        |
| 19       | 5                      | -                     | DCP(3)          | 110        | 10        | 76        |
| 20       | 5                      | CuI(2)                | DCP(3)          | 110        | 10        | 79        |
| 21       | 5                      | CuI(5)                | DCP(3)          | 110        | 10        | 81        |
| 22       | 5                      | CuCl(10)              | DCP(3)          | 110        | 10        | 75        |
| 23       | 5                      | CuBr(10)              | DCP(3)          | 110        | 10        | 70        |
| 24       | 5                      | Cu <sub>2</sub> O(10) | DCP(3)          | 110        | 10        | 78        |
| 25       | 0.5                    | CuI (10)              | DCP(3)          | 110        | 10        | 18        |
| 26       | 1                      | CuI (10)              | DCP(3)          | 110        | 10        | 53        |
| 27       | 2                      | CuI(10)               | DCP(3)          | 110        | 10        | 62        |
| 28       | 3                      | CuI (10)              | DCP(3)          | 110        | 10        | 69        |
| 29       | 10eq+t-Butanol(5)      | CuI (10)              | DCP(3)          | 110        | 10        | Trace     |
| 30       | 10eq+TFE(5)            | CuI (10)              | DCP(3)          | 110        | 10        | Trace     |
| 31       | 10eq+Benzene(5)        | CuI (10)              | DCP(3)          | 110        | 10        | Trace     |
| 32       | 5                      | -                     | DCP(0.2)        | 110        | 10        | Trace     |
| 33       | 5                      | -                     | DCP(0.5)        | 110        | 10        | Trace     |
| 34       | 5                      | -                     | DCP(1)          | 110        | 10        | 20        |
| 35       | 5                      | -                     | DCP(2)          | 110        | 10        | 68        |

## Typical procedure

**Reaction of Acetonitriles with alkenes:** A mixture of alkenes (1 equiv., 0.20 mmol), acetonitriles (5 mL), CuI (10 mol%, 0.02 mmol), and DCP (3 eq, 0.60 mmol) was heated at 110 °C (the measured temperature of the oil bath) under nitrogen condition for 10 h in a sealed tube (15 mL). After the reaction finished, the mixture was evaporated under vacuum and purified by column chromatography to afford the desired product.

## Substrate scope <sup>a</sup>

| Starting alkene                                                                     | Product                                                                                                          |
|-------------------------------------------------------------------------------------|------------------------------------------------------------------------------------------------------------------|
| 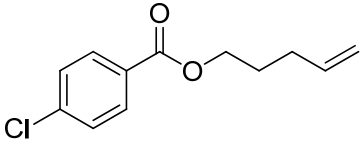   | <br><b>1, 90%<sup>b</sup></b>  |
|   | <br><b>2, 73%</b>             |
|  | <br><b>3, 66%</b>            |
|  | <br><b>4, 76%</b>            |
|  | <br><b>5, 50%</b>            |
|  | <br><b>6, 63%</b>            |
|  | <br><b>7, 58%, (rsm 23%)</b> |

|                                                                                     |                                                                                                                                                 |
|-------------------------------------------------------------------------------------|-------------------------------------------------------------------------------------------------------------------------------------------------|
| 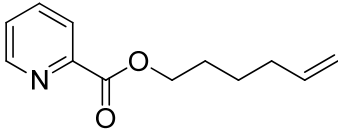   | <br><b>8</b> , 56%, (rsm 26%)                                 |
|    | <br><b>9</b> , 28%,(rsm 58%)                                  |
|    | <br><b>10</b> , 60%                                           |
|   | <br><b>11</b> , 62%                                           |
|  | <br><b>12</b> , 46%, (rsm 43%)                              |
|  | <br><b>13</b> , 50%, (rsm 36%)                              |
|  | <br><b>14</b> , 46%, (rsm 36%)<br>d.r. = 2.5/1 <sup>c</sup> |
|  | <br><b>15</b> , 60%, (rsm 24%)                              |
|  | <br><b>16</b> , 72%                                         |
|  | <br><b>17</b> , 40%, (rsm 51%)                              |

|                                                                                     |                                                                                                                |
|-------------------------------------------------------------------------------------|----------------------------------------------------------------------------------------------------------------|
| 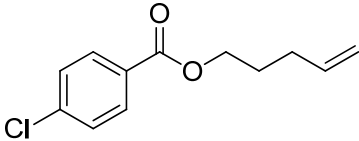   | <br><b>18, 46%, (rsm38%)</b> |
|    | <br><b>19, 73%, (rsm18%)</b> |
|    | <br><b>20, 88%</b>           |
|    | <br><b>21, 76%</b>           |
|  | <br><b>22, 70%</b>          |

<sup>a</sup> Reaction conditions: Alkenes (1 equiv, 0.20 mmol), CuI (0.02 mmol), DCP (3 equiv, 0.60 mmol), 5 mL of nitriles as solvent, N<sub>2</sub>, 110 °C, sealed tube, 10 h. <sup>b</sup> Isolated yields. <sup>c</sup> Obtained as a mixture of diastereoisomers and the diastereomeric ratio determined by <sup>1</sup>H NMR spectroscopy.

### Competing Kinetic Isotope Effect (KIE) Experiment:

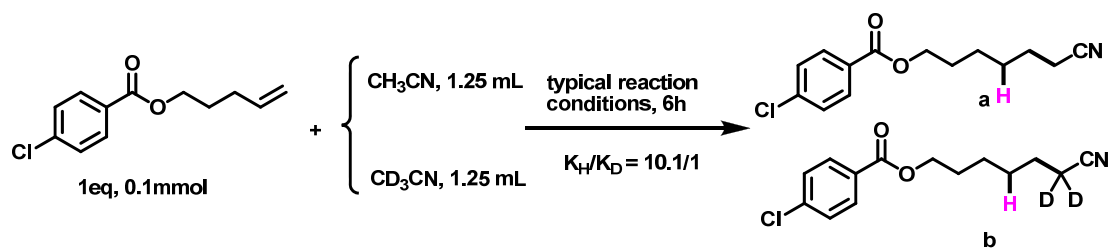

Conversion 23%, a(yield, 20%), b(yield, 2%)

<sup>1</sup>H NMR

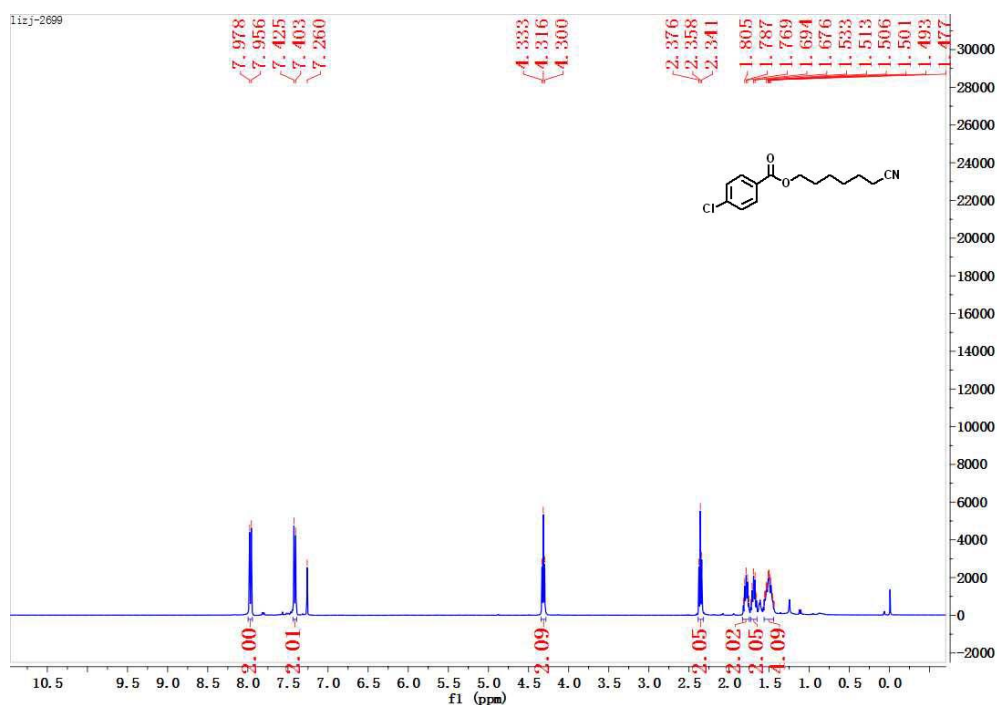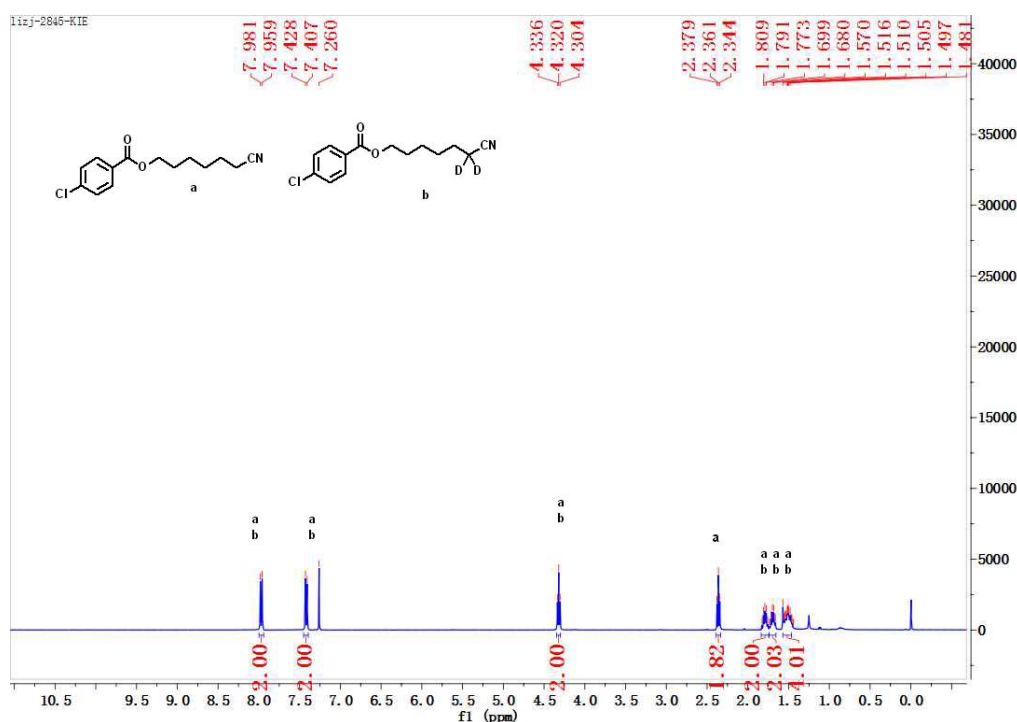

**Note:** The value of  $k_H/k_D$  was calculated from the  $^1\text{H}$  NMR spectra above which should be the mixture of compound **a** and **b** (the KIE scheme). The sum of the integral of **a** and **b** at chemical shift 4.30 – 4.34 was integrated as 2.00 (both **a** and **b** keep the same double bond hydrogen). Compound **a** has 2 hydrogen atoms at chemical shift 2.34 – 2.38, while **b** has no H atoms. The amount of **a** could be defined as 1.82, on the other hand, the sum of **a** and **b** is 2.00, so the amount of **b** is 0.18 ( $2.00 - 1.82 = 0.18$ ). As a result,  $k_H/k_D = 1.82 / 0.18 = 10.1$ .

## The Experiment by Addition of TEMPO :

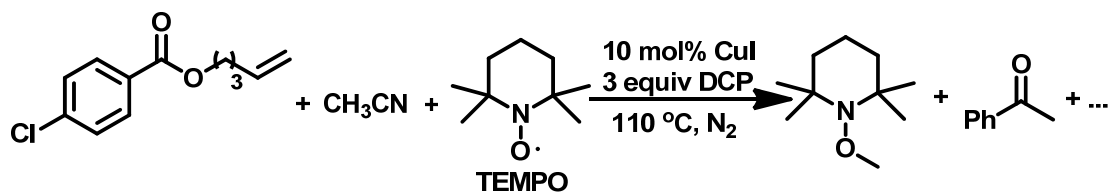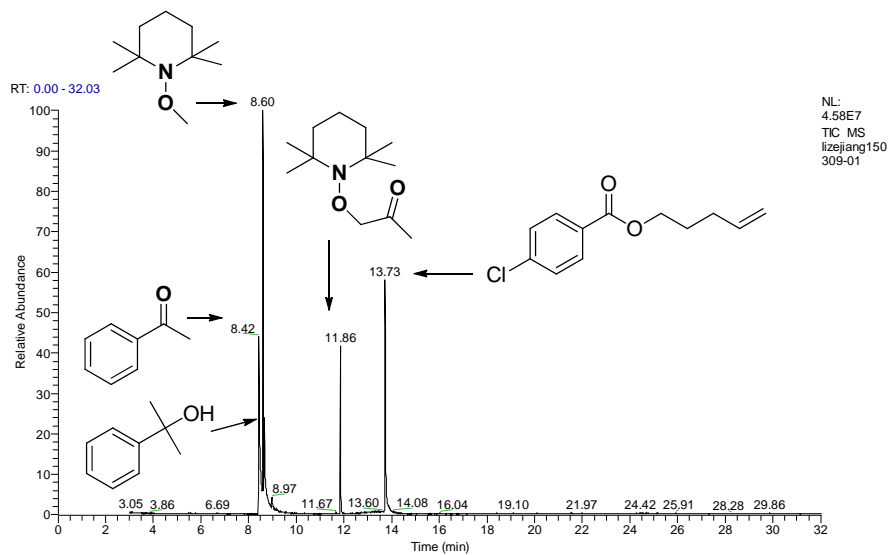

lizejiang150309-01 #979 RT: 8.42 AV: 1 NL: 5.31E6  
 T: + c Full ms [35.00-650.00]

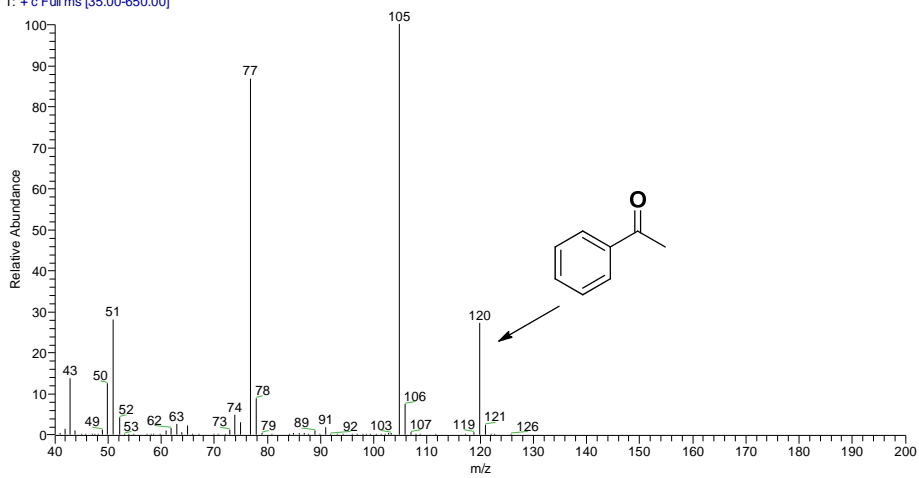

lizejiang150309-01 #1013 RT: 8.61 AV: 1 NL: 8.88E6  
T: + c Full ms [35.00-650.00]

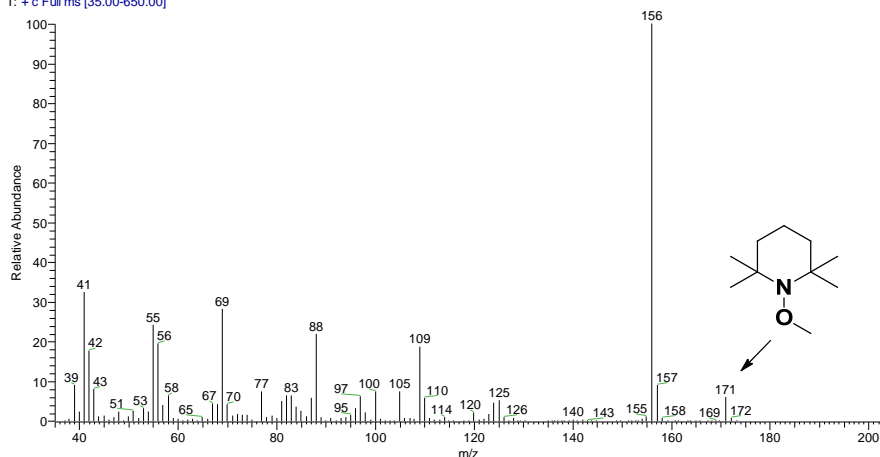

lizejiang150309-01 #1600 RT: 11.86 AV: 1 NL: 2.87E6  
T: + c Full ms [35.00-650.00]

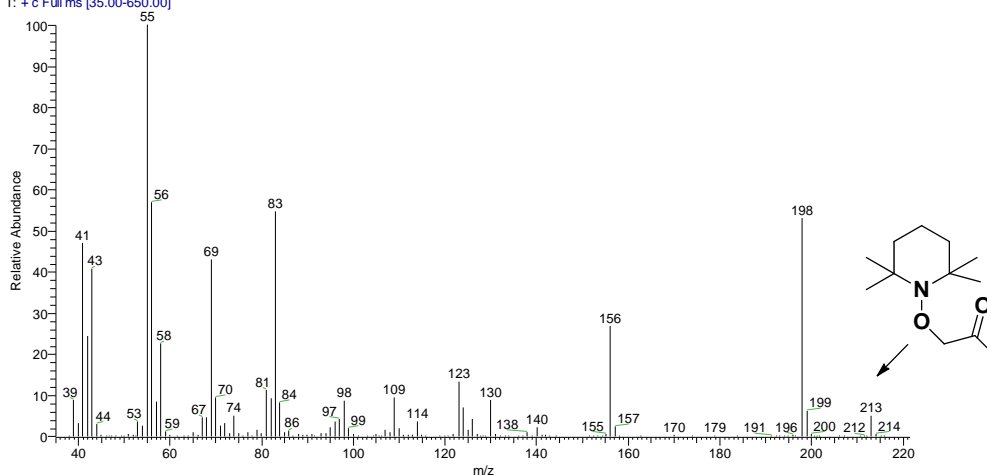

### Physical data and references for the following products:

All known compounds are determined by  $^1\text{H}$  NMR,  $^{13}\text{C}$  NMR and  $^{31}\text{P}$  NMR, MS analysis and compared with which were cited in the following references, and the new compounds were further confirmed by HRMS and/or element analysis.

### References:

1. J. W. Bruno, T. J. Marks, F. D. Lewis, *J. Am. Chem. Soc.*, 1982, **104**, 5580.
2. T. Kamitanaka, T. Hikida, S. Hayashi, N. Kishida, T. Matsuda, T. Harada, *Tetrahedron Lett.* 2007, **48**, 8460.
3. J. Li, Z. Wang, N. Wu, G. Gao, J. You, *Chem. Commun.* 2014, **50**, 15049.
4. Y. Li, B. Liu, H.-B. Li, Q. Wang, J.-H. Li, *Chem. Commun.* 2015, **51**, 1024.
5. A. Bunescu, Q. Wang, J.-P. Zhu, *Angew. Chem. Int. Ed.* 2015, **54**, 3132.
6. C. C. Sazepin, Q. Wang, G. M. Sammis, J.-P. Zhu, *Angew. Chem. Int. Ed.* 2015, DOI: 10.1002/anie.201412357.



## Physical data for the following products:

### 1. 6-cyanoheptyl 4-chlorobenzoate

A yellow liquid after purification by flash column chromatography (petroleum ether/ethyl acetate = 10/1).

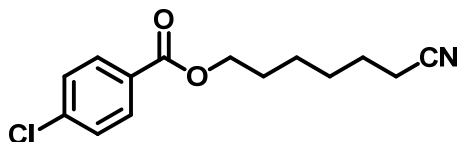

**<sup>1</sup>H NMR (400 MHz, CDCl<sub>3</sub>):** δ 7.97 (d, *J* = 8.8 Hz, 2H), 7.41 (d, *J* = 8.8 Hz, 2H), 4.32 (t, *J* = 6.4 Hz, 2H), 2.36 (t, *J* = 7.2 Hz, 2H), 1.82 – 1.75 (m, 2H), 1.73 – 1.66 (m, 2H), 1.59 – 1.44 (m, 4H).

**<sup>13</sup>C NMR (100 MHz, CDCl<sub>3</sub>):** δ 165.7, 139.3, 130.9, 128.7, 128.6, 119.6, 64.9, 28.4, 28.3, 25.3, 25.2, 17.1.

**HRMS (ESI, m/z):** Calculated for C<sub>14</sub>H<sub>17</sub>ClNO<sub>2</sub> (M+H)<sup>+</sup> 266.0942, found 266.0939.

### 2. 5-cyanopentyl 4-bromobenzoate

A colorless liquid after purification by flash column chromatography (petroleum ether/ethyl acetate = 10/1)

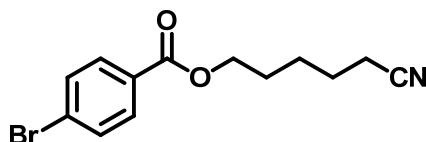

**<sup>1</sup>H NMR (400 MHz, CDCl<sub>3</sub>):** δ 7.89 (d, *J* = 8.8 Hz, 2H), 7.58 (d, *J* = 8.4 Hz, 2H), 4.33 (t, *J* = 6.4 Hz, 2H), 2.39 (t, *J* = 7.2 Hz, 2H), 1.85 – 1.71 (m, 4H), 1.65 – 1.57 (m, 2H).

**<sup>13</sup>C NMR (100 MHz, CDCl<sub>3</sub>):** δ 165.8, 131.7, 131.0, 129.0, 128.1, 119.4, 64.6, 27.9, 25.2, 25.0, 17.1.

**HRMS (ESI, m/z):** Calculated for C<sub>13</sub>H<sub>14</sub>BrNO<sub>2</sub>NH<sub>4</sub>(M+NH<sub>4</sub>)<sup>+</sup> 313.0546, found 313.0542.

### 3. 5-cyanopentyl 4-methoxybenzoate

A colorless liquid after purification by flash column chromatography (petroleum ether/ethyl

acetate = 10/1)

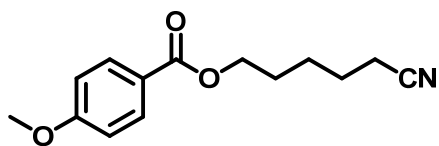

**<sup>1</sup>H NMR (400 MHz, CDCl<sub>3</sub>):**  $\delta$  7.98 (d,  $J$  = 8.8 Hz, 2H), 6.92 (d,  $J$  = 8.8 Hz, 2H), 4.30 (t,  $J$  = 6.4 Hz, 2H), 3.85 (s, 3H), 2.38 (t,  $J$  = 7.2 Hz, 2H), 1.84 – 1.71 (m, 4H), 1.65 – 1.57 (m, 2H).

**<sup>13</sup>C NMR (100 MHz, CDCl<sub>3</sub>):**  $\delta$  166.3, 163.3, 131.5, 122.6, 119.5, 113.6, 64.0, 55.4, 28.0, 25.3, 25.0, 17.1.

**HRMS (ESI, m/z):** Calculated for C<sub>14</sub>H<sub>18</sub>NO<sub>3</sub> (M+H)<sup>+</sup> 248.1281, found 248.1278.

#### 4. 4-cyanobutyl benzo[d][1,3]dioxole-5-carboxylate

A colorless liquid after purification by flash column chromatography (petroleum ether/ethyl acetate = 10/1)

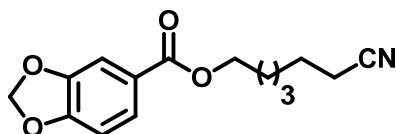

**<sup>1</sup>H NMR (400 MHz, CDCl<sub>3</sub>):**  $\delta$  7.64 (dd,  $J$  = 8.4, 1.2 Hz, 1H), 7.45 (d,  $J$  = 1.2 Hz, 1H), 6.84 (d,  $J$  = 8.4 Hz, 1H), 6.04 (s, 2H), 4.28 (t,  $J$  = 6.4 Hz, 2H), 2.35 (t,  $J$  = 7.2 Hz, 2H), 1.80 – 1.73 (m, 2H), 1.73 – 1.66 (m, 2H), 1.56 – 1.45 (m, 4H).

**<sup>13</sup>C NMR (100 MHz, CDCl<sub>3</sub>):**  $\delta$  165.9, 151.5, 147.7, 125.2, 124.3, 119.6, 109.4, 107.9, 101.8, 64.6, 28.5, 28.3, 25.3, 25.2, 17.1.

**HRMS (ESI, m/z):** Calculated for C<sub>15</sub>H<sub>18</sub>NO<sub>4</sub> (M+H)<sup>+</sup> 276.1230, found 276.1229.

#### 5. 4-cyanobutyl 4-(N,N-dipropylsulfamoyl)benzoate

A colorless liquid after purification by flash column chromatography (petroleum ether/ethyl acetate = 5/1).

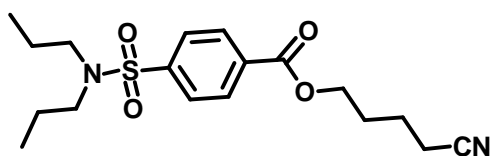

**<sup>1</sup>H NMR (400 MHz, CDCl<sub>3</sub>):**  $\delta$  8.14 (d,  $J$  = 8.4 Hz, 2H), 7.88 (d,  $J$  = 8.4 Hz, 2H),

4.40 (t,  $J = 6.4$  Hz, 2H), 3.10 (t,  $J = 8.0$  Hz, 4H), 2.45 (t,  $J = 6.8$  Hz, 2H), 2.00 – 1.94 (m, 2H), 1.88 – 1.81 (m, 2H), 1.59 – 1.52 (m, 4H), 0.87 (t,  $J = 7.2$  Hz, 6H).

$^{13}\text{C}$  NMR (100 MHz,  $\text{CDCl}_3$ ):  $\delta$  165.1, 144.4, 133.2, 130.2, 127.0, 119.1, 64.3, 49.9, 27.7, 22.3, 21.9, 16.9, 11.1.

HRMS (ESI,  $m/z$ ): Calculated for  $\text{C}_{18}\text{H}_{27}\text{N}_2\text{O}_4\text{S}$  ( $\text{M}+\text{H}$ ) $^+$  367.1686, found 367.1690.

## 6. 6-cyanoethyl 4-(*N,N*-dipropylsulfamoyl)benzoate

A colorless liquid after purification by flash column chromatography (petroleum ether/ethyl acetate = 5/1)

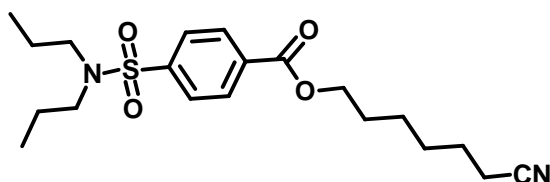

$^1\text{H}$  NMR (400 MHz,  $\text{CDCl}_3$ ):  $\delta$  8.14 (d,  $J = 8.8$  Hz, 2H), 7.87 (d,  $J = 8.8$  Hz, 2H), 4.35 (t,  $J = 6.4$  Hz, 2H), 3.11 – 3.07 (m, 4H), 2.36 (t,  $J = 7.2$  Hz, 2H), 1.84 – 1.77 (m, 2H), 1.73 – 1.66 (m, 2H), 1.58 – 1.49 (m, 8H), 0.86 (t,  $J = 7.2$  Hz, 6H).

$^{13}\text{C}$  NMR (100 MHz,  $\text{CDCl}_3$ ):  $\delta$  165.2, 144.2, 133.5, 130.1, 126.9, 119.6, 65.3, 49.9, 28.4, 28.3, 25.3, 25.2, 21.9, 17.1, 11.1.

HRMS (ESI,  $m/z$ ): Calculated for  $\text{C}_{20}\text{H}_{31}\text{N}_2\text{O}_4\text{S}$  ( $\text{M}+\text{H}$ ) $^+$  395.1999, found 395.2000.

## 7. 6-cyanoethyl furan-2-carboxylate

A colorless liquid after purification by flash column chromatography (petroleum ether/ethyl acetate = 10/1)

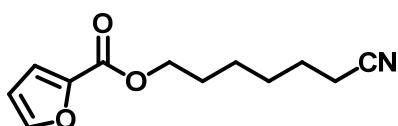

$^1\text{H}$  NMR (400 MHz,  $\text{CDCl}_3$ ):  $\delta$  7.58 (d,  $J = 0.8$  Hz, 1H), 7.18 (d,  $J = 3.6$  Hz, 1H), 6.51 (dd,  $J = 3.6, 1.6$  Hz, 1H), 4.31 (t,  $J = 6.4$  Hz, 2H), 2.35 (t,  $J = 7.2$  Hz, 2H), 1.81 – 1.74 (m, 2H), 1.73 – 1.65 (m, 2H), 1.57 – 1.44 (m, 4H).

$^{13}\text{C}$  NMR (151 MHz,  $\text{cdcl}_3$ ):  $\delta$  158.8, 146.2, 144.7, 119.6, 117.8, 111.8, 64.6, 28.4,

28.3, 25.3, 25.2, 17.1.

**HRMS (ESI, m/z):** Calculated for  $C_{12}H_{15}NO_3NH_4(M+NH_4)^+$  239.1390, found 239.1392.

### 8. 7-cyanoheptyl picolinate

A yellow liquid after purification by flash column chromatography (petroleum ether/ethyl acetate = 2/1)

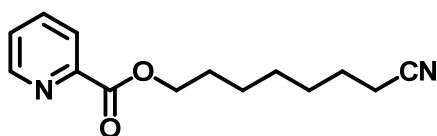

**$^1H$  NMR (400 MHz,  $CDCl_3$ ):**  $\delta$  8.75 (d,  $J = 4.4$  Hz, 1H), 8.11 (d,  $J = 7.6$  Hz, 1H), 7.84 (td,  $J = 7.6, 1.6$  Hz, 1H), 7.47 (dd,  $J = 7.6, 5.6$  Hz, 1H), 4.40 (t,  $J = 6.8$  Hz, 2H), 2.32 (t,  $J = 7.2$  Hz, 2H), 1.86 – 1.78 (m, 2H), 1.68 – 1.61 (m, 2H), 1.50 – 1.38 (m, 6H).

**$^{13}C$  NMR (100 MHz,  $CDCl_3$ ):**  $\delta$  165.2, 149.8, 148.1, 136.9, 126.8, 125.0, 119.7, 65.7, 28.5, 28.4, 28.3, 25.6, 25.2, 17.1.

**HRMS (ESI, m/z):** Calculated for  $C_{14}H_{19}N_2O_2 (M+H)^+$  247.1441, found 247.1439.

### 9. 4-cyanobutyl 1-methyl-1H-indole-3-carboxylate

A yellow liquid after purification by flash column chromatography (petroleum ether/ethyl acetate = 5/1)

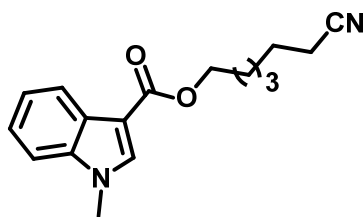

**$^1H$  NMR (400 MHz,  $CDCl_3$ ):**  $\delta$  8.15 (dd,  $J = 6.4, 3.2$  Hz, 1H), 7.80 (s, 1H), 7.37 – 7.34 (m, 1H), 7.33 – 7.28 (m, 2H), 4.34 (t,  $J = 6.4$  Hz, 2H), 3.85 (s, 3H), 2.35 (t,  $J = 7.2$  Hz, 2H), 1.85 – 1.79 (m, 2H), 1.75 – 1.66 (m, 2H), 1.59 – 1.53 (m, 4H).

**$^{13}C$  NMR (100 MHz,  $CDCl_3$ ):**  $\delta$  165.1, 137.2, 135.2, 126.5, 122.7, 121.8, 121.6, 119.7, 109.8, 107.0, 63.4, 33.4, 28.7, 28.4, 25.5, 25.3, 17.1.

**HRMS (ESI, m/z):** Calculated for  $C_{17}H_{21}N_2O_2$  ( $M+H$ )<sup>+</sup> 285.1598, found 285.1600.

### 10. 5-(1,3-dioxisoindolin-2-yl)pentanenitrile

A light yellow liquid after purification by flash column chromatography (petroleum ether/ethyl acetate = 5/1).

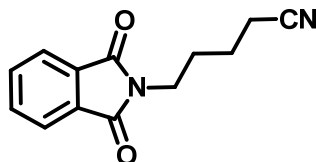

**<sup>1</sup>H NMR (400 MHz, CDCl<sub>3</sub>):**  $\delta$  7.85 (dd,  $J = 5.2, 3.2$  Hz, 2H), 7.73 (dd,  $J = 5.2, 3.2$  Hz, 2H), 3.73 (t,  $J = 6.8$  Hz, 2H), 2.43 (t,  $J = 7.2$  Hz, 2H), 1.89 – 1.82 (m, 2H), 1.75 – 1.67 (m, 2H).

**<sup>13</sup>C NMR (100 MHz, CDCl<sub>3</sub>):**  $\delta$  168.3, 134.1, 131.9, 123.3, 119.2, 36.6, 27.6, 22.6, 16.6.

**HRMS (ESI, m/z):** Calculated for  $C_{13}H_{12}N_2O_2NH_4$ ( $M+NH_4$ )<sup>+</sup> 246.1237, found 246.1236.

### 11. 6-(1,3-dioxisoindolin-2-yl)hexanenitrile

A light yellow liquid after purification by flash column chromatography (petroleum ether/ethyl acetate = 5/1).

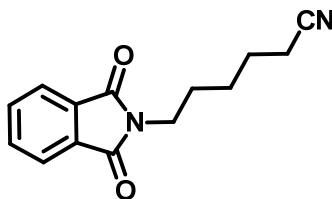

**<sup>1</sup>H NMR (400 MHz, CDCl<sub>3</sub>):**  $\delta$  7.83 (dd,  $J = 5.2, 3.2$  Hz, 2H), 7.71 (dd,  $J = 5.2, 3.2$  Hz, 2H), 3.69 (t,  $J = 7.2$  Hz, 2H), 2.34 (t,  $J = 7.2$  Hz, 2H), 1.75 – 1.68 (m, 4H), 1.53 – 1.47 (m, 2H).

**<sup>13</sup>C NMR (100 MHz, CDCl<sub>3</sub>):**  $\delta$  168.3, 133.9, 132.0, 123.2, 119.4, 37.3, 27.7, 25.8, 24.8, 17.0.

**HRMS (ESI, m/z):** Calculated for  $C_{14}H_{14}N_2O_2NH_4$ ( $M+NH_4$ )<sup>+</sup> 260.1394, found 260.1391.

## 12. 7-hydroxyheptanenitrile

A yellow liquid after purification by flash column chromatography (petroleum ether/ethyl acetate = 10/1).

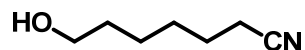

$^1\text{H NMR}$  (400 MHz,  $\text{CDCl}_3$ ):  $\delta$  3.64 (t,  $J = 6.4$  Hz, 2H), 2.35 (t,  $J = 7.2$  Hz, 2H), 1.70 – 1.63 (m, 2H), 1.61 – 1.54 (m, 2H), 1.52 – 1.36 (m, 4H).

$^{13}\text{C NMR}$  (100 MHz,  $\text{CDCl}_3$ ):  $\delta$  119.7, 62.6, 32.3, 28.4, 25.3, 24.9, 17.0.

**HRMS** (ESI,  $m/z$ ): Calculated for  $\text{C}_7\text{H}_{13}\text{NONH}_4(\text{M}+\text{NH}_4)^+$  145.1335, found 145.1331.

## 13. 8-hydroxyoctanenitrile

A yellow liquid after purification by flash column chromatography (petroleum ether/ethyl acetate = 10/1).

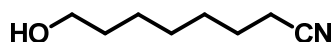

$^1\text{H NMR}$  (400 MHz,  $\text{CDCl}_3$ ):  $\delta$  3.64 (t,  $J = 6.4$  Hz, 2H), 2.34 (t,  $J = 7.2$  Hz, 2H), 1.70 – 1.63 (m, 2H), 1.61 – 1.54 (m, 2H), 1.51 – 1.42 (m, 2H), 1.38 – 1.31 (m, 4H).

$^{13}\text{C NMR}$  (100 MHz,  $\text{CDCl}_3$ ):  $\delta$  119.7, 62.8, 32.5, 28.6, 28.5, 25.4, 25.3, 17.1.

**HRMS** (ESI,  $m/z$ ): Calculated for  $\text{C}_8\text{H}_{15}\text{NONH}_4(\text{M}+\text{NH}_4)^+$  159.1492, found 159.1488.

## 14. 2-(3-(hydroxymethyl)cyclopentyl)acetonitrile

A colorless liquid after purification by flash column chromatography (petroleum ether/ethyl acetate = 5/1)

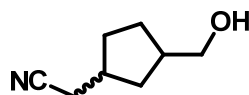

$^1\text{H NMR}$  (400 MHz,  $\text{CDCl}_3$ ):  $\delta$  3.51 (d,  $J = 6.4$  Hz, 2H), 2.36 (d,  $J = 6.8$  Hz, 2H), 2.30 – 2.21 (m, 2H), 2.00 – 1.87 (m, 2H), 1.74 – 1.67 (m, 1H), 1.58 – 1.52 (m, 1H), 1.39 – 1.30 (m, 2H).

**<sup>13</sup>C NMR (100 MHz, CDCl<sub>3</sub>):** δ 119.1, 66.7, 40.8, 35.5, 34.4, 32.1, 28.6, 22.8.

**HRMS (ESI, m/z):** Calculated for C<sub>8</sub>H<sub>13</sub>NONH<sub>4</sub>(M+NH<sub>4</sub>)<sup>+</sup> 157.1335, found 157.1332.

### 15. 5-hydroxy-5,9,13,17-tetramethyloctadecanenitrile

A colorless liquid after purification by flash column chromatography (petroleum ether/ethyl acetate = 2/1).

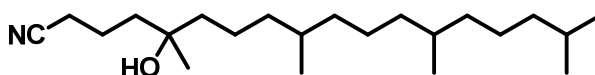

**<sup>1</sup>H NMR (400 MHz, CDCl<sub>3</sub>):** δ 2.38 (t, *J* = 7.2 Hz, 2H), 1.80 – 1.72 (m, 2H), 1.60 – 1.45 (m, 4H), 1.43 – 1.25 (m, 13H), 1.18 (s, 3H), 1.16 – 1.02 (m, 6H), 0.87 – 0.83 (m, 12H).

**<sup>13</sup>C NMR (100 MHz, CDCl<sub>3</sub>):** δ 119.7, 72.4, 42.6, 40.5, 39.3, 37.4, 37.3, 37.2, 32.8, 32.7, 28.0, 26.8, 26.7, 24.8, 24.5, 22.7, 22.6, 21.3, 20.1, 19.7, 19.6, 17.7.

**HRMS (ESI, m/z):** Calculated for C<sub>22</sub>H<sub>43</sub>NONH<sub>4</sub>(M+NH<sub>4</sub>)<sup>+</sup> 355.3683, found 355.3679.

### 16. 8-(oxiran-2-yl)octanenitrile

A colorless liquid after purification by flash column chromatography (petroleum ether/ethyl acetate = 10/1).

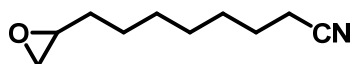

**<sup>1</sup>H NMR (400 MHz, CDCl<sub>3</sub>):** δ 2.89 (d, *J* = 8.8 Hz, 1H), 2.75 (t, *J* = 4.4 Hz, 1H), 2.47 – 2.45 (m, 1H), 2.34 (t, *J* = 7.2 Hz, 2H), 1.69 – 1.62 (m, 2H), 1.57 – 1.42 (m, 6H), 1.40 – 1.35 (m, 4H).

**<sup>13</sup>C NMR (100 MHz, CDCl<sub>3</sub>):** δ 119.8, 52.3, 47.0, 32.4, 29.1, 28.7, 28.5, 25.8, 25.3, 17.1.

**HRMS (ESI, m/z):** Calculated for C<sub>10</sub>H<sub>17</sub>NONH<sub>4</sub>(M+NH<sub>4</sub>)<sup>+</sup> 185.1648, found 185.1645.

### 17. 6-cyanooctyl 4-chlorobenzoate

A colorless liquid after purification by flash column chromatography (petroleum ether/ethyl acetate = 10/1)

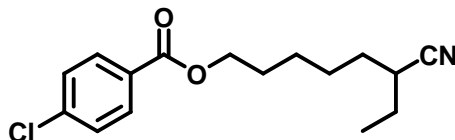

**<sup>1</sup>H NMR (400 MHz, CDCl<sub>3</sub>):** 7.97 (d, *J* = 8.8Hz, 2H), 7.42 (d, *J* = 8.8Hz, 2H), 4.32 (t, *J* = 6.4Hz, 2H), 2.52 – 2.44 (m, 1H), 1.83 – 1.76 (m, 1H), 1.67 – 1.45 (m, 8H), 1.26 – 1.22 (m, 1H), 1.08 (t, *J* = 7.2 Hz, 3H).

**<sup>13</sup>C NMR (100 MHz, CDCl<sub>3</sub>):** δ 165.7, 139.3, 130.9, 128.8, 128.7, 122.1, 65.0, 33.3, 31.8, 28.5, 26.9, 25.7, 25.6, 11.6.

**HRMS (ESI, m/z):** Calculated for C<sub>16</sub>H<sub>20</sub>ClNO<sub>2</sub>NH<sub>4</sub>(M+NH<sub>4</sub>)<sup>+</sup> 311.1521, found 311.1525.

### 18. 6-cyanononyl 4-chlorobenzoate

A yellow liquid after purification by flash column chromatography (petroleum ether/ethyl acetate = 5/1)

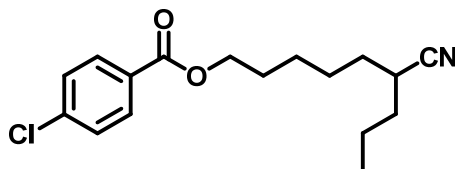

**<sup>1</sup>H NMR (400 MHz, CDCl<sub>3</sub>):** δ 7.97 (d, *J* = 8.4 Hz, 2H), 7.41 (d, *J* = 8.4 Hz, 2H), 4.32 (t, *J* = 6.4 Hz, 2H), 2.55 – 2.50 (m, 1H), 1.84 – 1.75 (m, 2H), 1.65 – 1.41 (m, 10H), 0.95 (t, *J* = 7.2 Hz, 3H).

**<sup>13</sup>C NMR (100 MHz, CDCl<sub>3</sub>):** δ 165.7, 139.3, 130.9, 128.8, 128.7, 122.2, 65.0, 34.3, 32.2, 31.4, 28.5, 26.9, 25.7, 20.4, 13.6.

**HRMS (ESI, m/z):** Calculated for C<sub>17</sub>H<sub>22</sub>ClNO<sub>2</sub>NH<sub>4</sub>(M+NH<sub>4</sub>)<sup>+</sup> 325.1677, found 325.1674.

### 19. 6-bromo-6-cyanoethyl 4-chlorobenzoate

A colorless liquid after purification by flash column chromatography (petroleum ether/ethyl



acetate = 10/1)

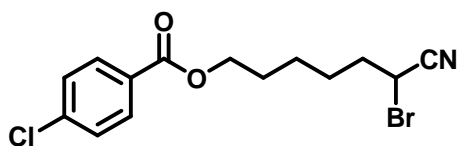

**<sup>1</sup>H NMR (400 MHz, CDCl<sub>3</sub>):**  $\delta$  7.97 (d,  $J$  = 8.8 Hz, 2H), 7.42 (d,  $J$  = 8.4 Hz, 2H), 4.41 – 4.31 (m, 2H), 4.15 – 4.09 (m, 1H), 2.66 – 2.62 (m, 2H), 2.25 – 1.89 (m, 6H).

**<sup>13</sup>C NMR (100 MHz, CDCl<sub>3</sub>):**  $\delta$  165.6, 139.5, 130.9, 128.8, 128.5, 118.6, 64.1, 53.9, 35.5, 34.7, 26.9, 16.1.

**HRMS (ESI, m/z):** Calculated for C<sub>14</sub>H<sub>15</sub>BrClNO<sub>2</sub>NH<sub>4</sub>(M+NH<sub>4</sub>)<sup>+</sup> 361.0313, found 361.0317.

## 20. 6-bromo-6-cyano-1-hexyl 4-(N,N-dipropylsulfamoyl)benzoate

A light yellow liquid after purification by flash column chromatography (petroleum ether/ethyl acetate = 5/1)

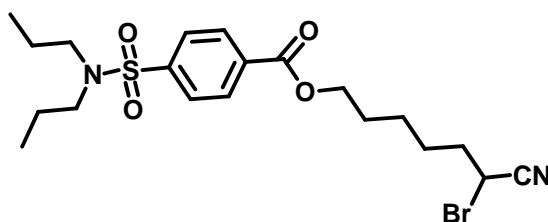

**<sup>1</sup>H NMR (400 MHz, CDCl<sub>3</sub>):**  $\delta$  8.14 (d,  $J$  = 8.4 Hz, 2H), 7.87 (d,  $J$  = 8.0 Hz, 2H), 4.44 – 4.35 (m, 2H), 4.15 – 4.09 (m, 1H), 3.08 (t,  $J$  = 7.6 Hz, 4H), 2.63 (t,  $J$  = 7.6 Hz, 2H), 2.25 – 1.92 (m, 6H), 1.58 – 1.48 (m, 4H), 0.85 (t,  $J$  = 7.2 Hz, 6H).

**<sup>13</sup>C NMR (100 MHz, CDCl<sub>3</sub>):**  $\delta$  165.1, 144.2, 133.2, 130.1, 126.9, 118.5, 64.5, 53.9, 49.8, 35.4, 34.6, 26.8, 21.8, 16.0, 11.1.

**HRMS (ESI, m/z):** Calculated for C<sub>20</sub>H<sub>29</sub>BrN<sub>2</sub>O<sub>4</sub>SNa(M+Na)<sup>+</sup> 495.0924, found 495.0918.

## 21. 2,10-dibromo-9-hydroxydecanenitrile

A yellow liquid after purification by flash column chromatography (petroleum ether/ethyl acetate = 5/1)

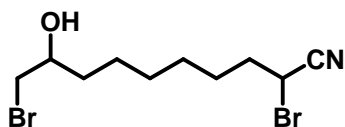

**<sup>1</sup>H NMR (400 MHz, CDCl<sub>3</sub>):** δ 4.08 – 4.02 (m, 1H), 3.78 (s, 1H), 3.55 – 3.51 (m, 1H), 3.38 (dd, *J* = 10.0, 6.8 Hz, 1H), 2.63 – 2.59 (m, 2H), 2.21 – 2.02 (m, 3H), 1.93 – 1.79 (m, 2H), 1.63 – 1.35 (m, 6H).

**<sup>13</sup>C NMR (100 MHz, CDCl<sub>3</sub>):** δ 118.7, 70.8, 54.6, 40.4, 38.6, 34.7, 34.5, 27.3, 24.9, 16.0.

**HRMS (ESI, *m/z*):** Calculated for C<sub>10</sub>H<sub>17</sub>Br<sub>2</sub>NONH<sub>4</sub> (M+NH<sub>4</sub>)<sup>+</sup> 343.0015, found 343.0016.

## 22. 6-cyano-7-ethoxy-7-oxoheptyl 4-chlorobenzoate

A colorless liquid after purification by flash column chromatography (petroleum ether/ethyl acetate = 10/1).

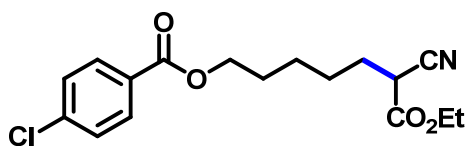

**<sup>1</sup>H NMR (400 MHz, CDCl<sub>3</sub>):** δ 7.97 (d, *J* = 8.4 Hz, 2H), 7.42 (d, *J* = 8.8 Hz, 2H), 4.32 (t, *J* = 6.4 Hz, 2H), 4.27 (q, *J* = 7.2 Hz, 2H), 3.50 (t, *J* = 6.8 Hz, 1H), 1.98 (dd, *J* = 15.2, 7.6 Hz, 2H), 1.84 – 1.77 (m, 2H), 1.62 – 1.49 (m, 4H), 1.32 (t, *J* = 7.2 Hz, 3H).

**<sup>13</sup>C NMR (151 MHz, cdcl<sub>3</sub>):** δ 166.0, 165.7, 139.4, 130.9, 128.7, 116.4, 110.0, 64.8, 62.8, 37.5, 29.7, 28.4, 26.5, 25.4, 14.0.

**HRMS (ESI, *m/z*):** Calculated for C<sub>17</sub>H<sub>20</sub>ClNO<sub>4</sub>Na(M+Na)<sup>+</sup> 360.0973, found 360.0977.

# Copies of the $^1\text{H}$ NMR, $^{13}\text{C}$ NMR, $^{135}\text{DEPT}$

## 1- $^1\text{H}$ NMR

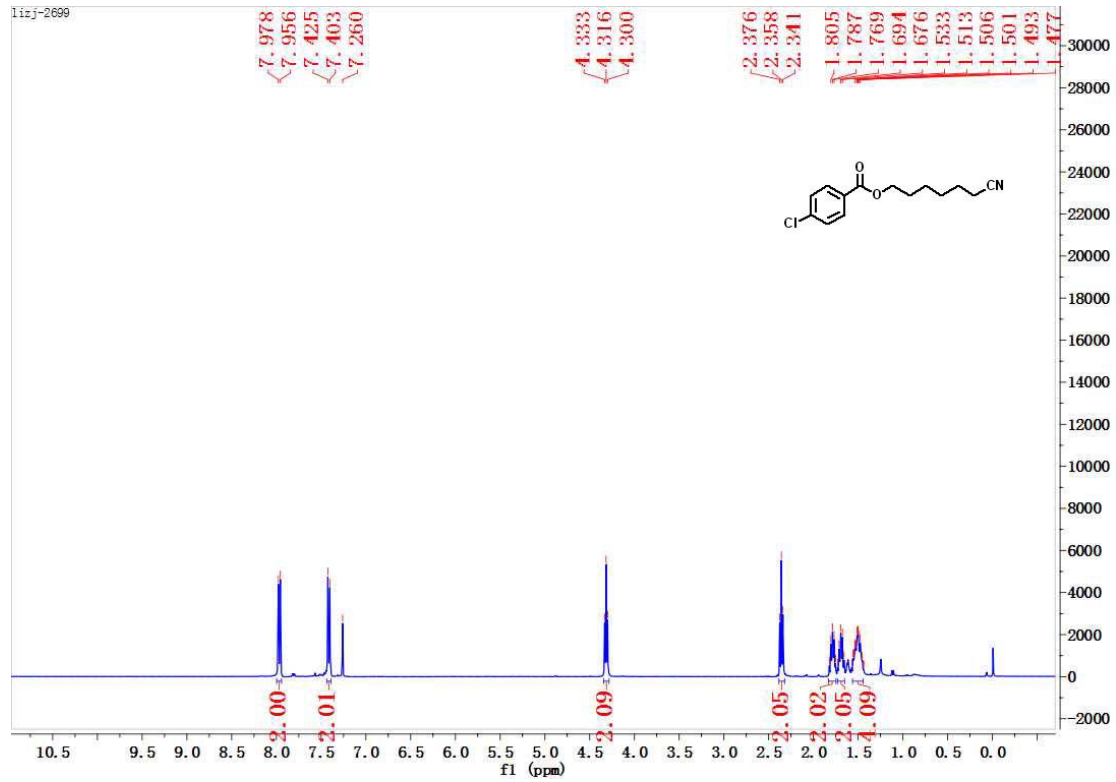

## 1- $^{13}\text{C}$ NMR

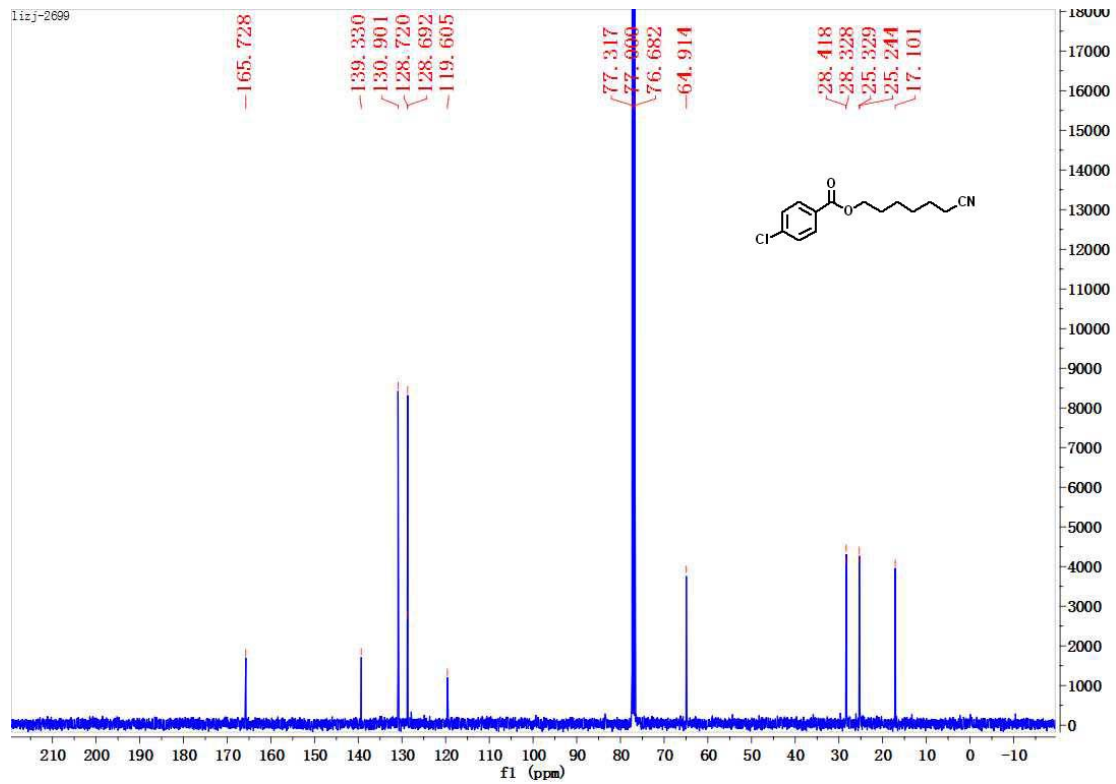

## $^1\text{H}$ NMR

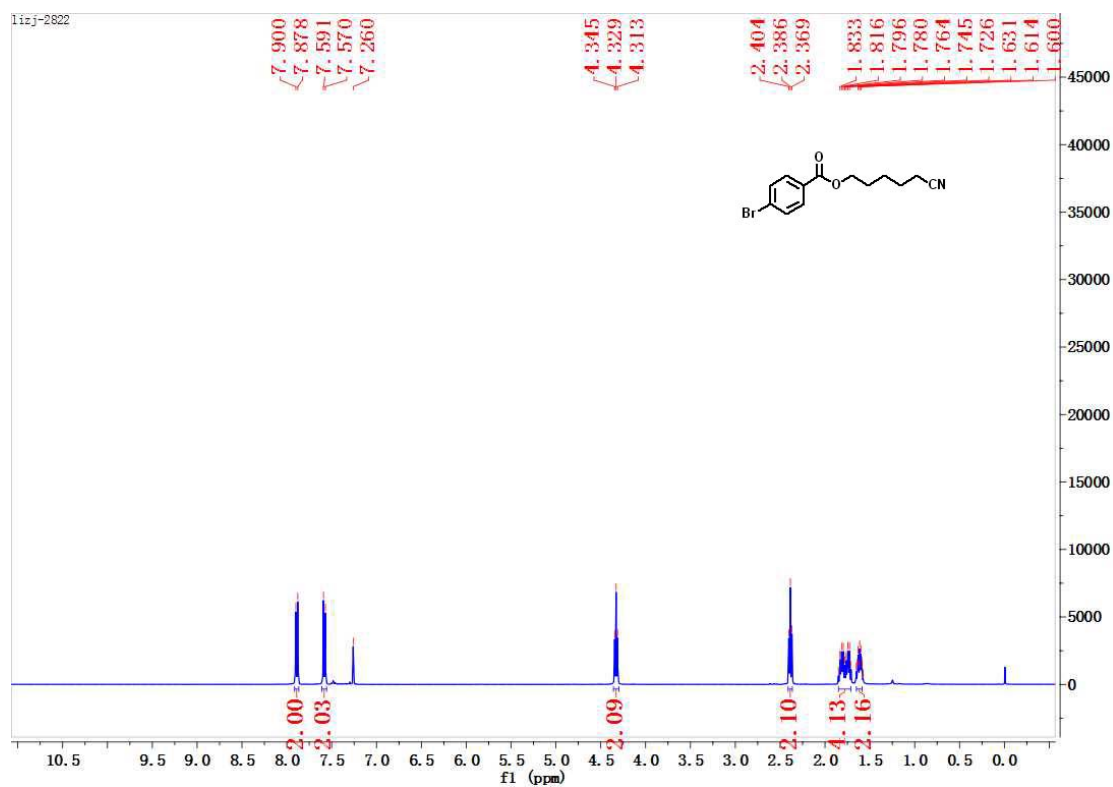

## $^{13}\text{C}$ NMR

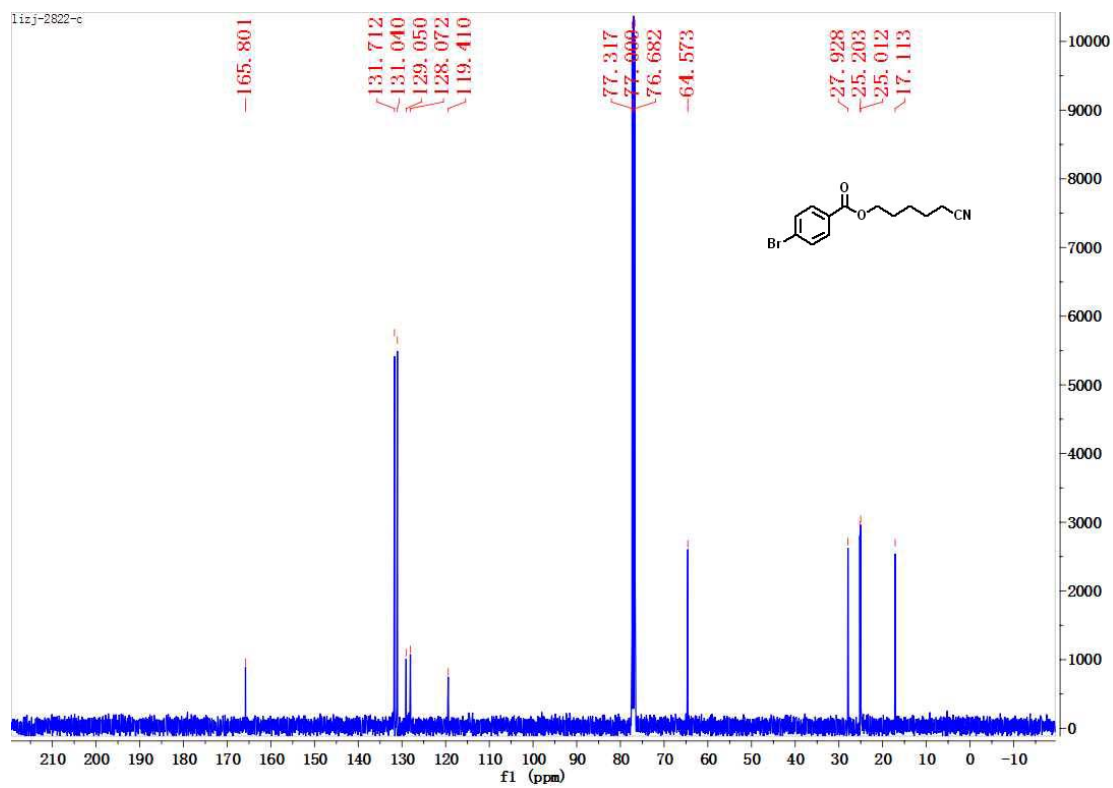

### $^1\text{H}$ NMR

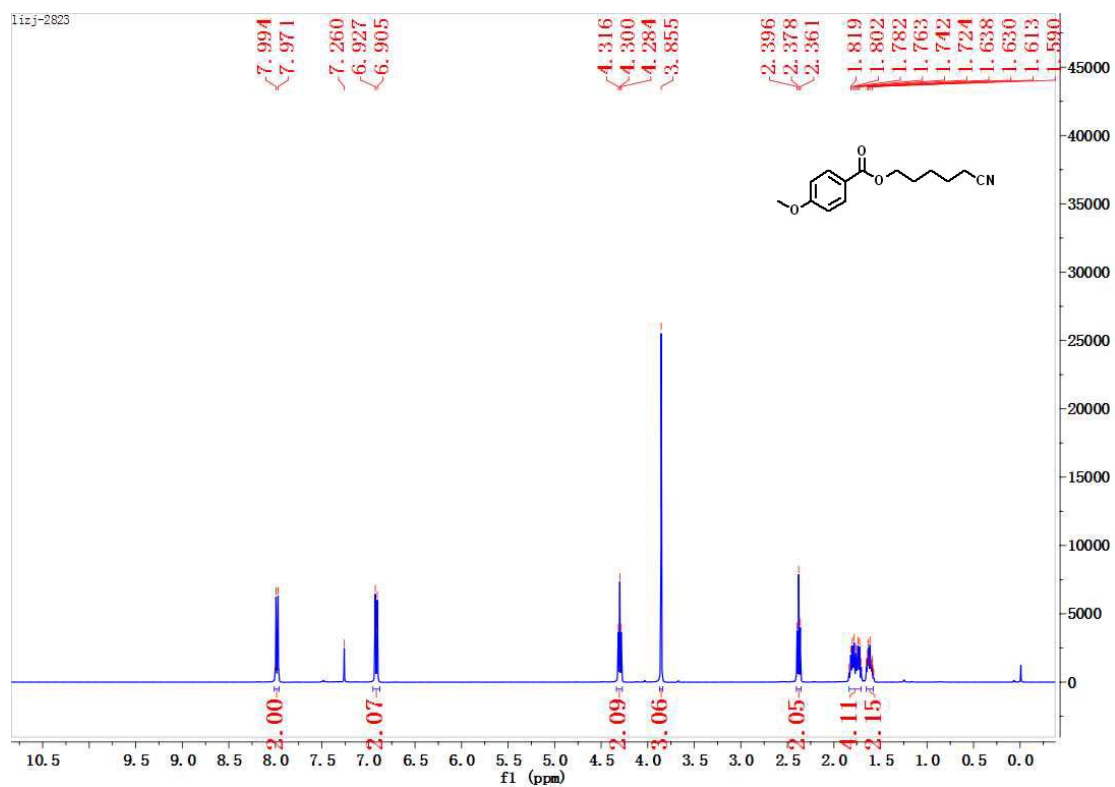

### $^{13}\text{C}$ NMR

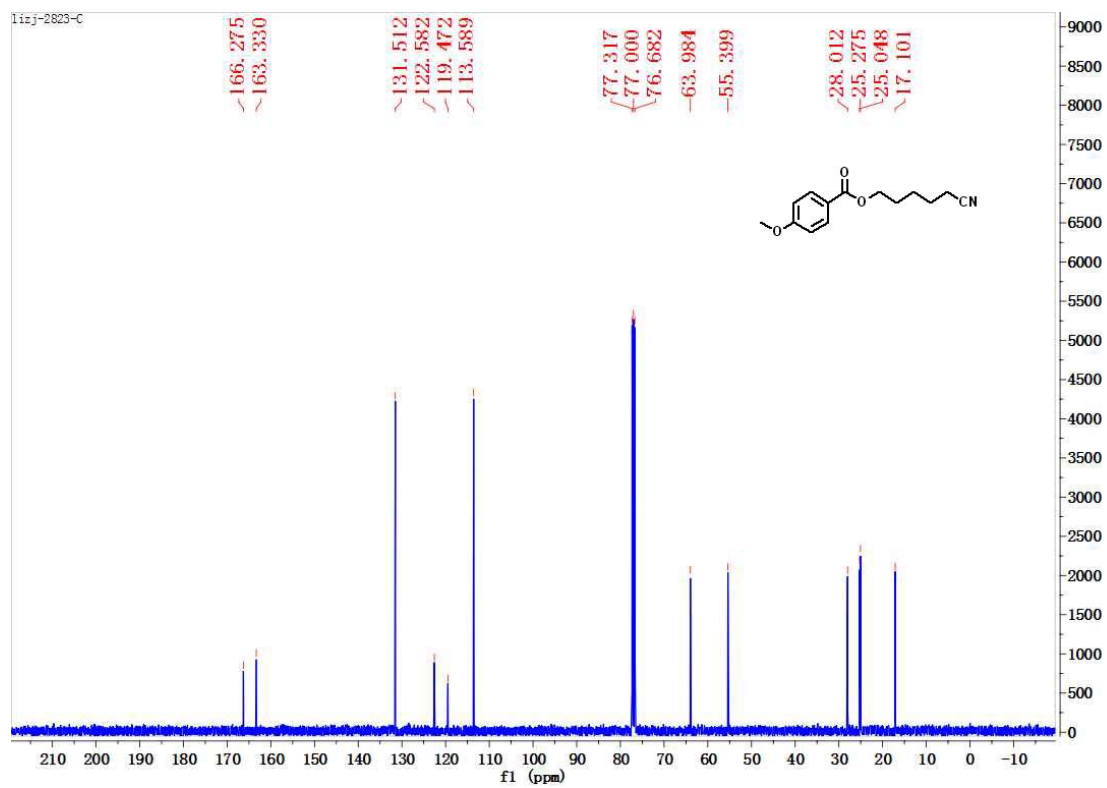

## 4-<sup>1</sup>H NMR

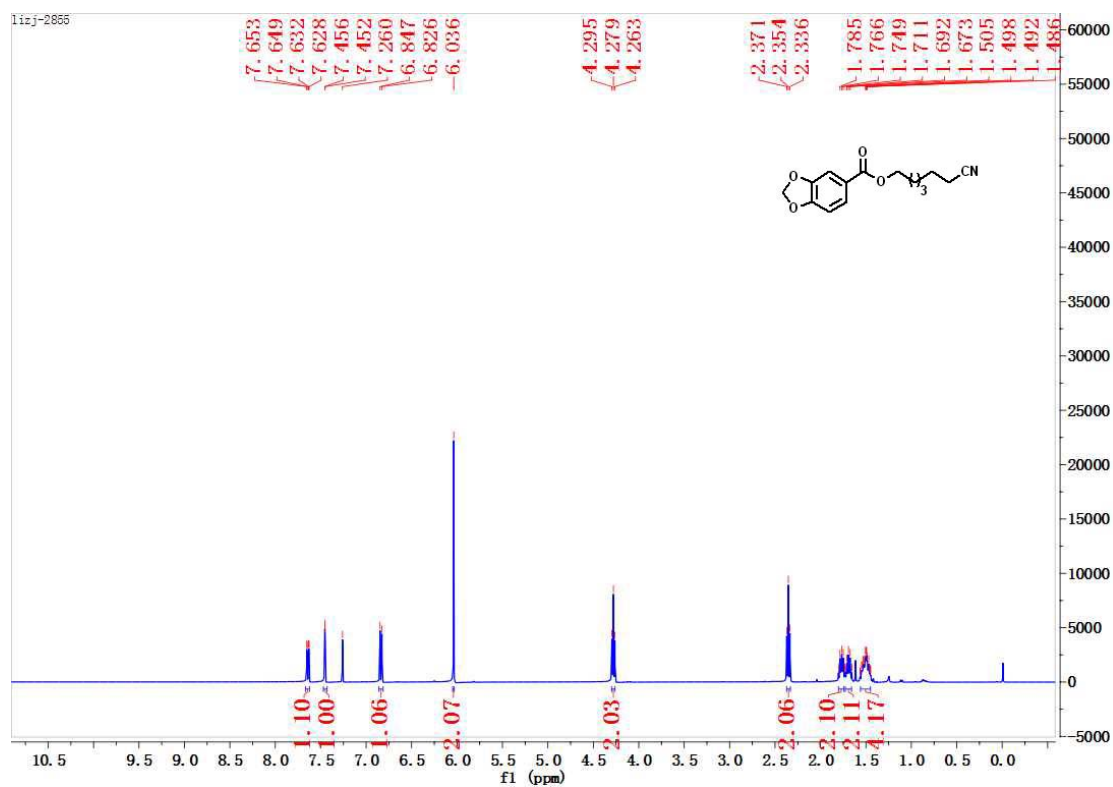

## 4-<sup>13</sup>C NMR

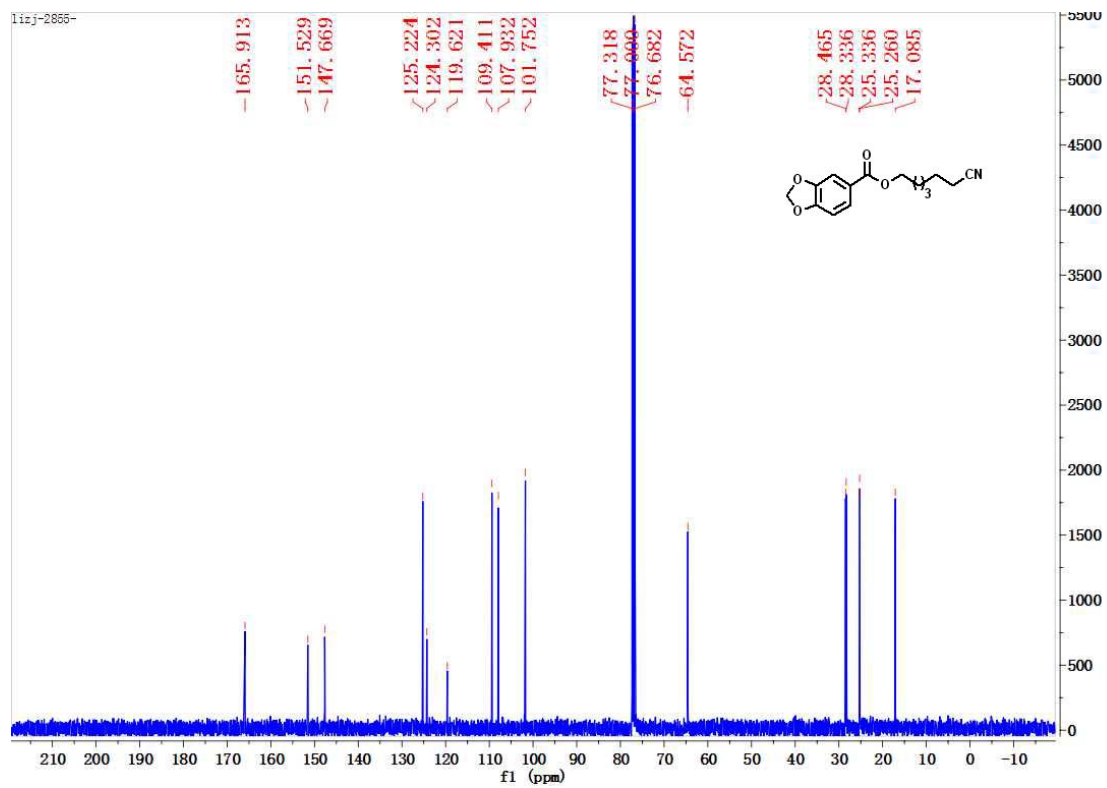

## 5-<sup>1</sup>H NMR

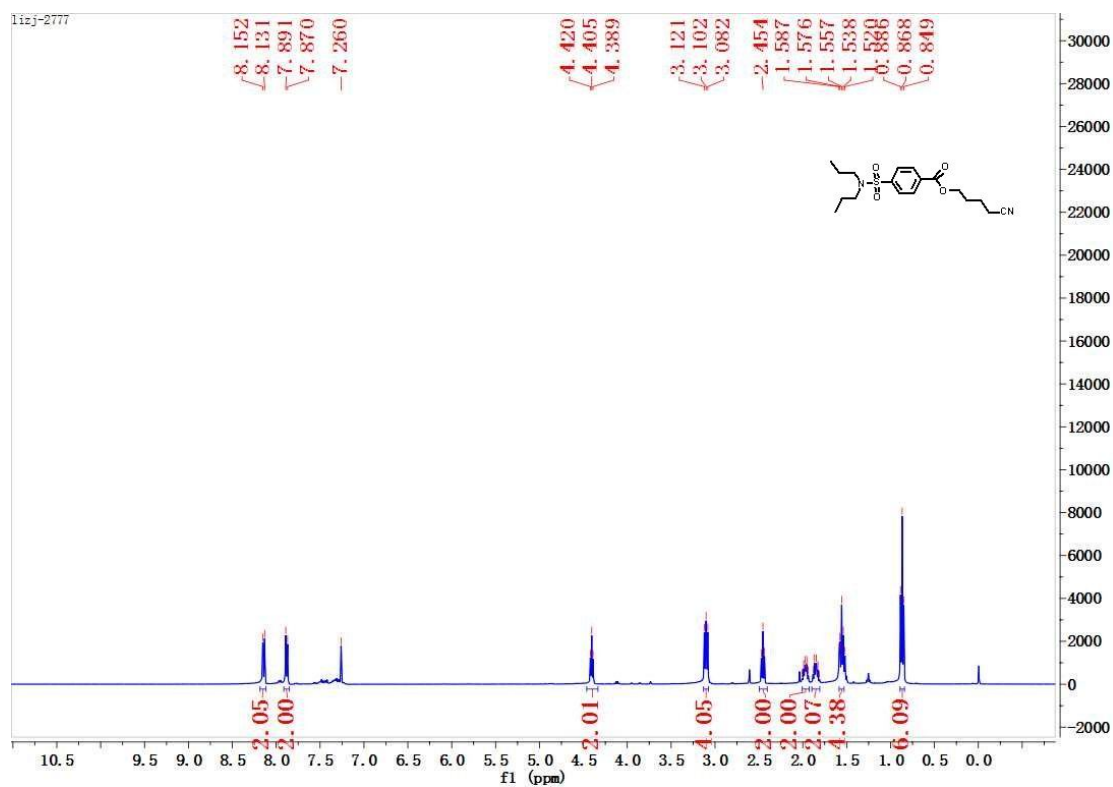

## 5-<sup>13</sup>C NMR

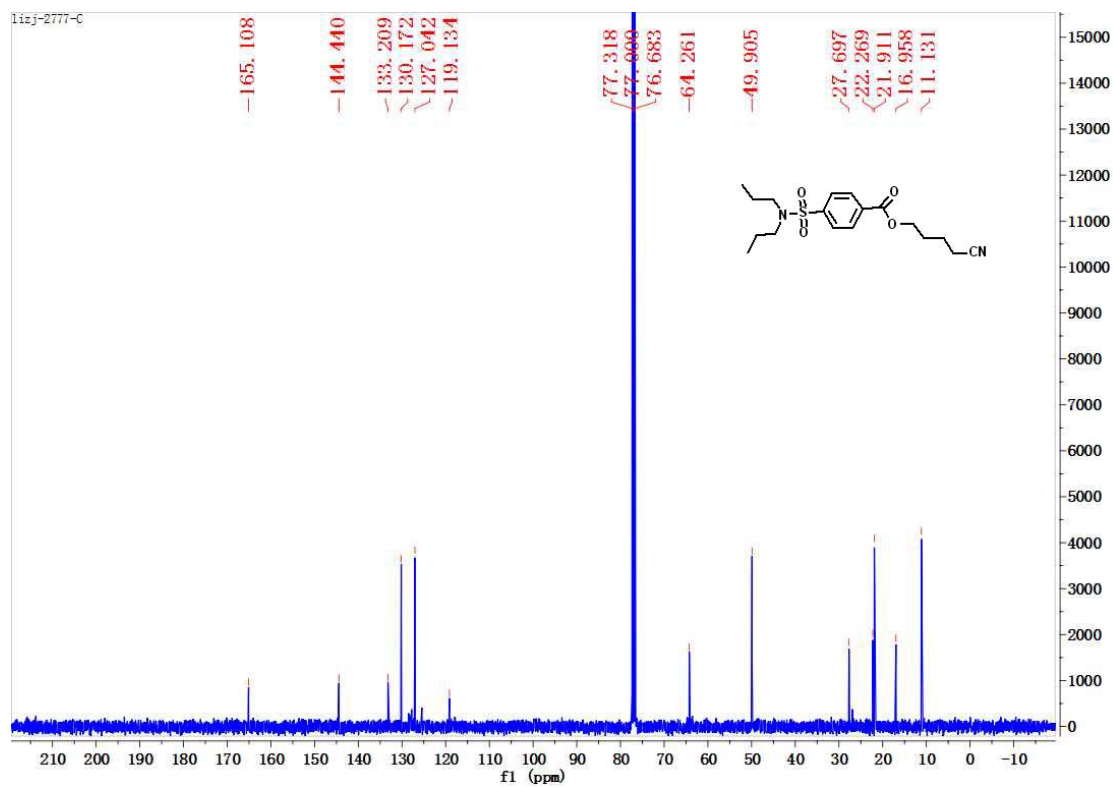

## 6-<sup>1</sup>H NMR

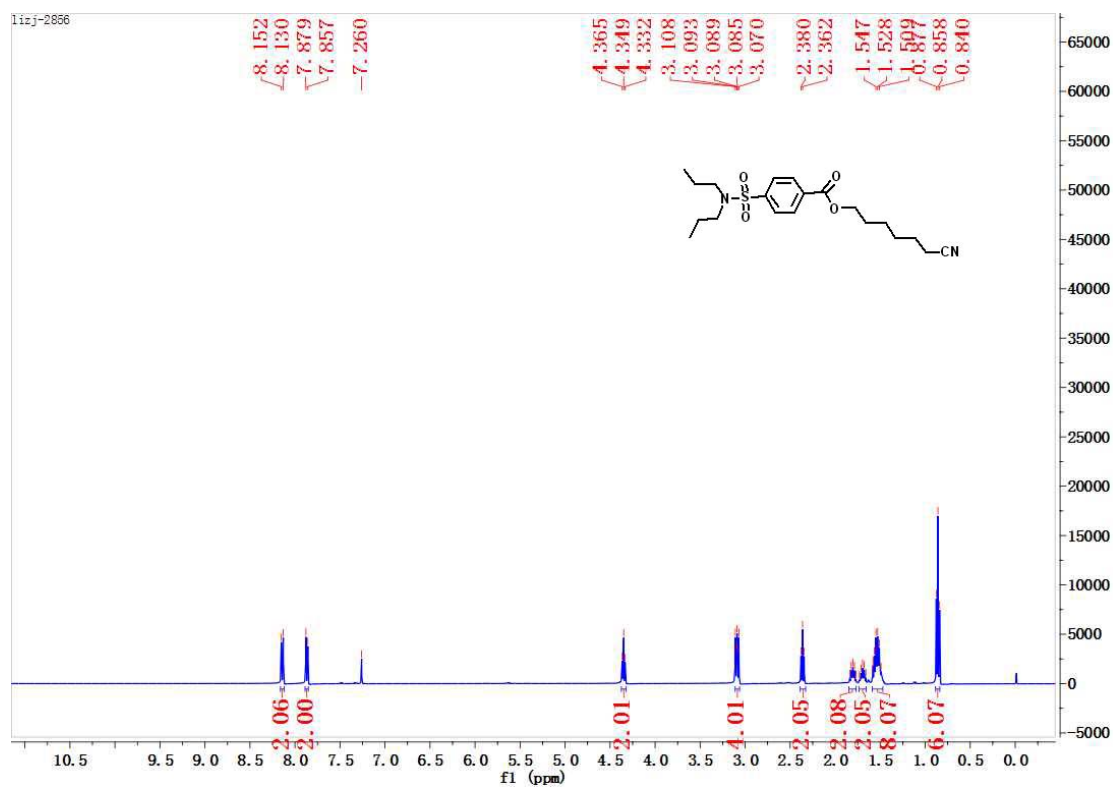

## 6-<sup>13</sup>C NMR

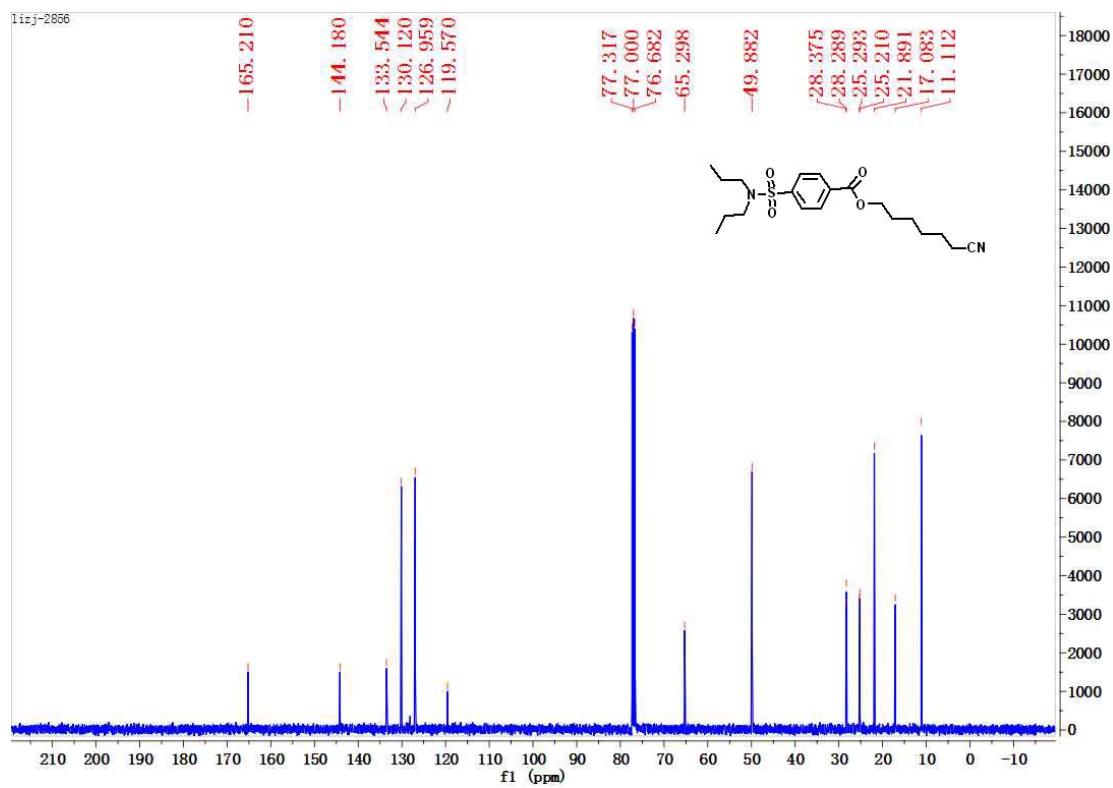



## 7-<sup>1</sup>H NMR

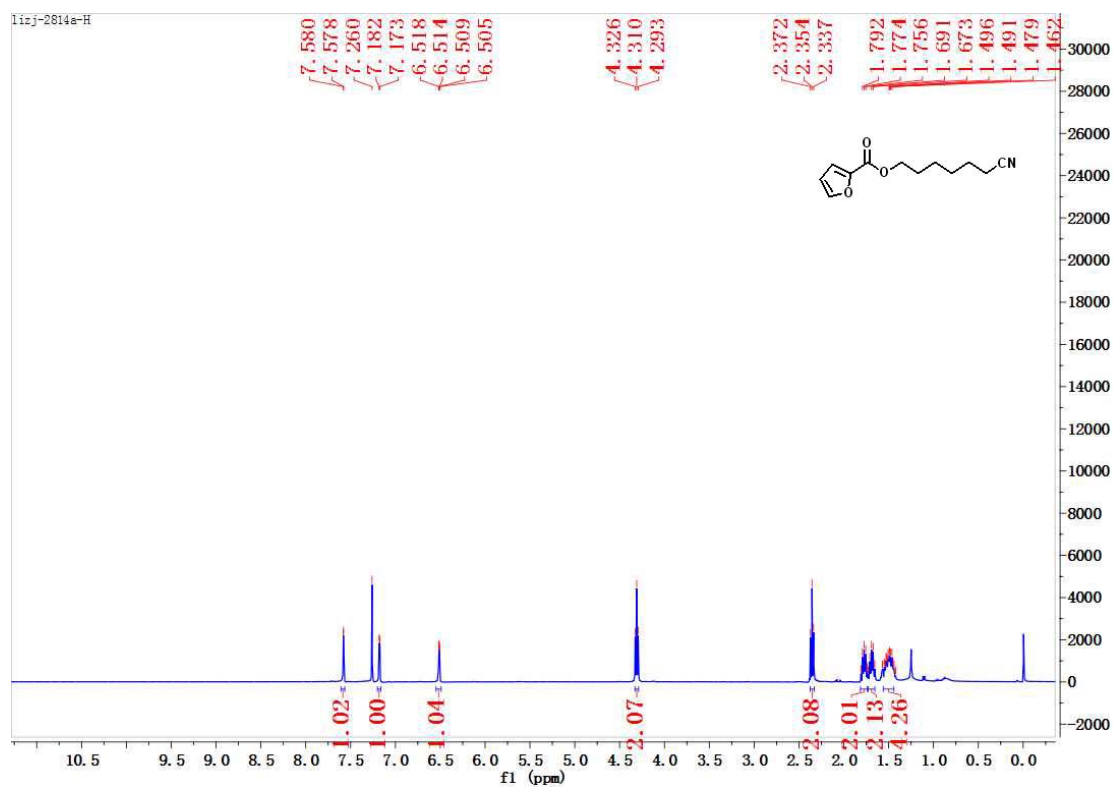

## 7-<sup>13</sup>C NMR

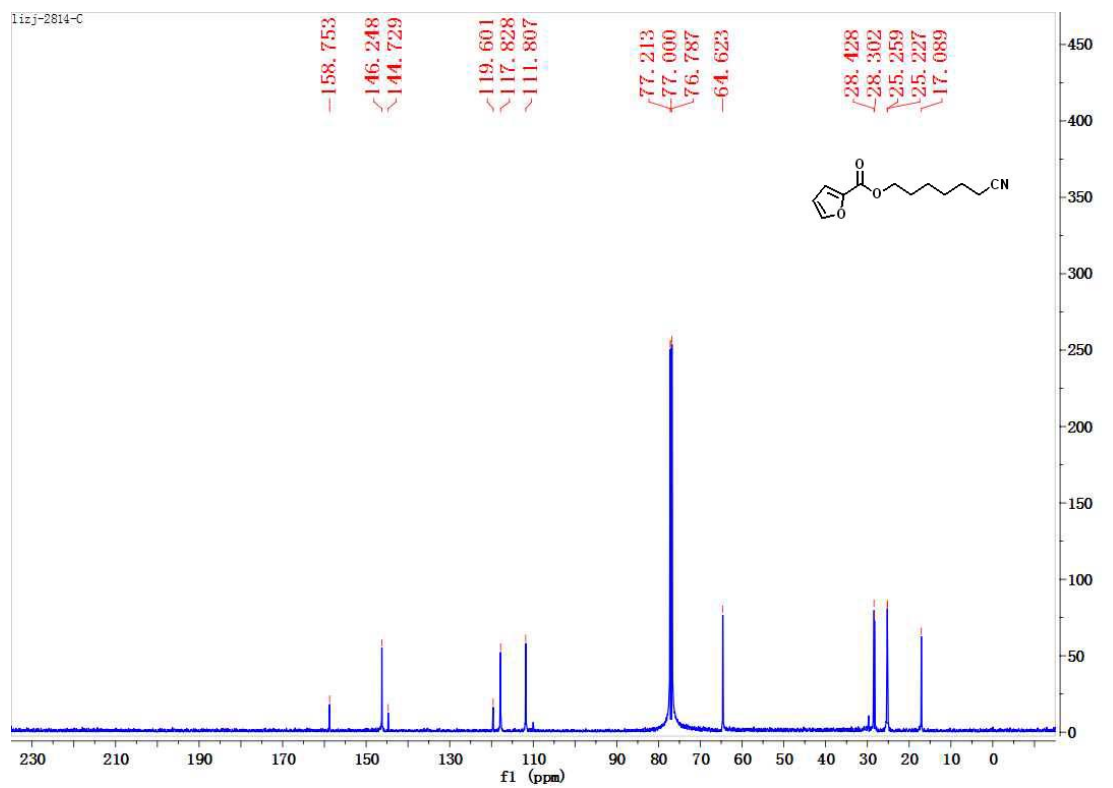

## 8-<sup>1</sup>H NMR

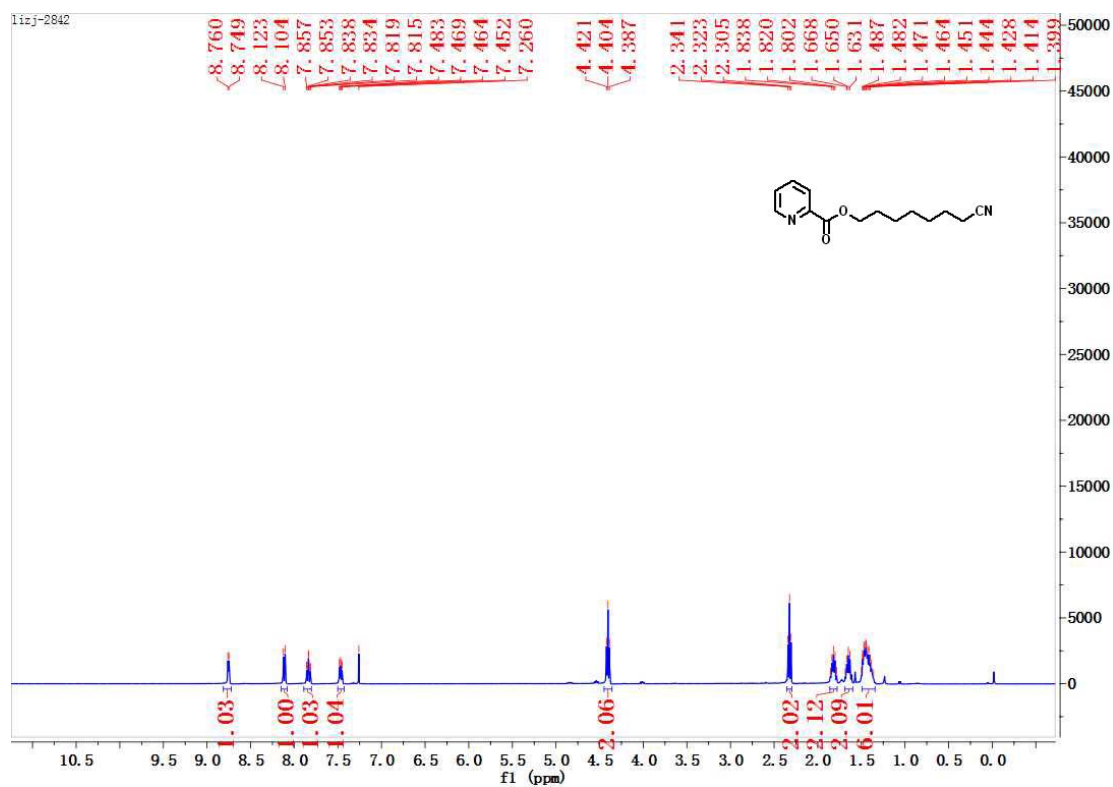

## 8-<sup>13</sup>C NMR

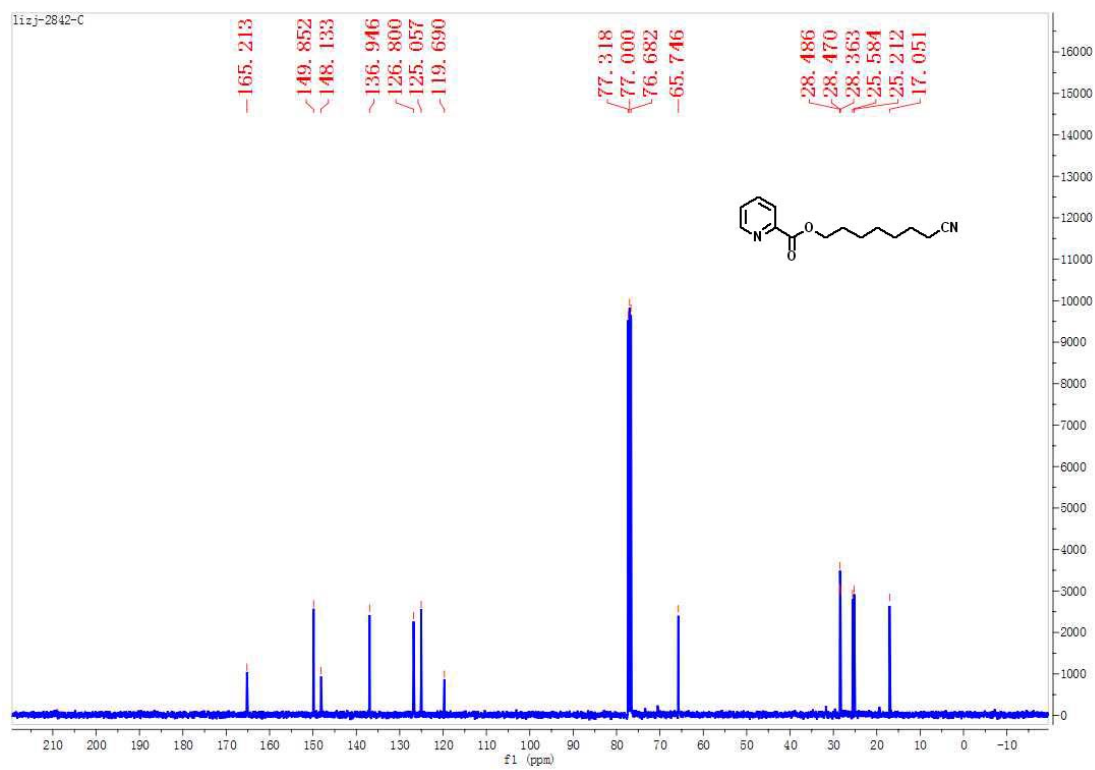

## 9-<sup>1</sup>H NMR

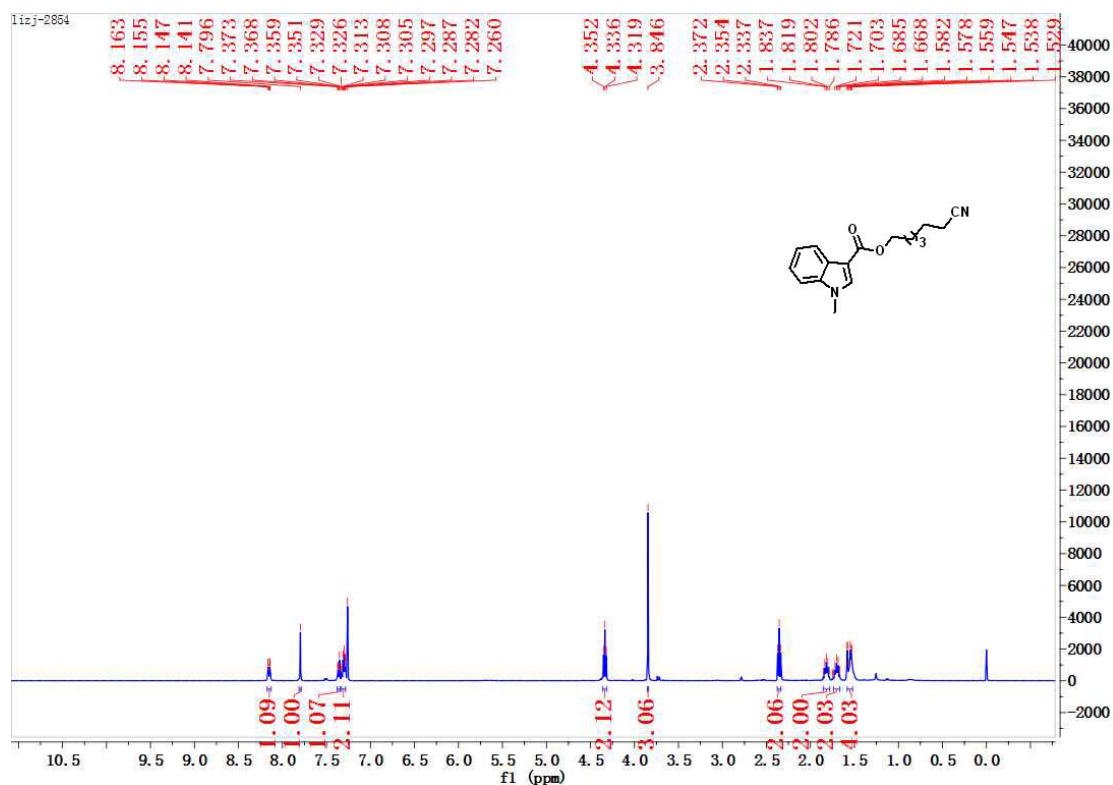

## 9-<sup>13</sup>C NMR

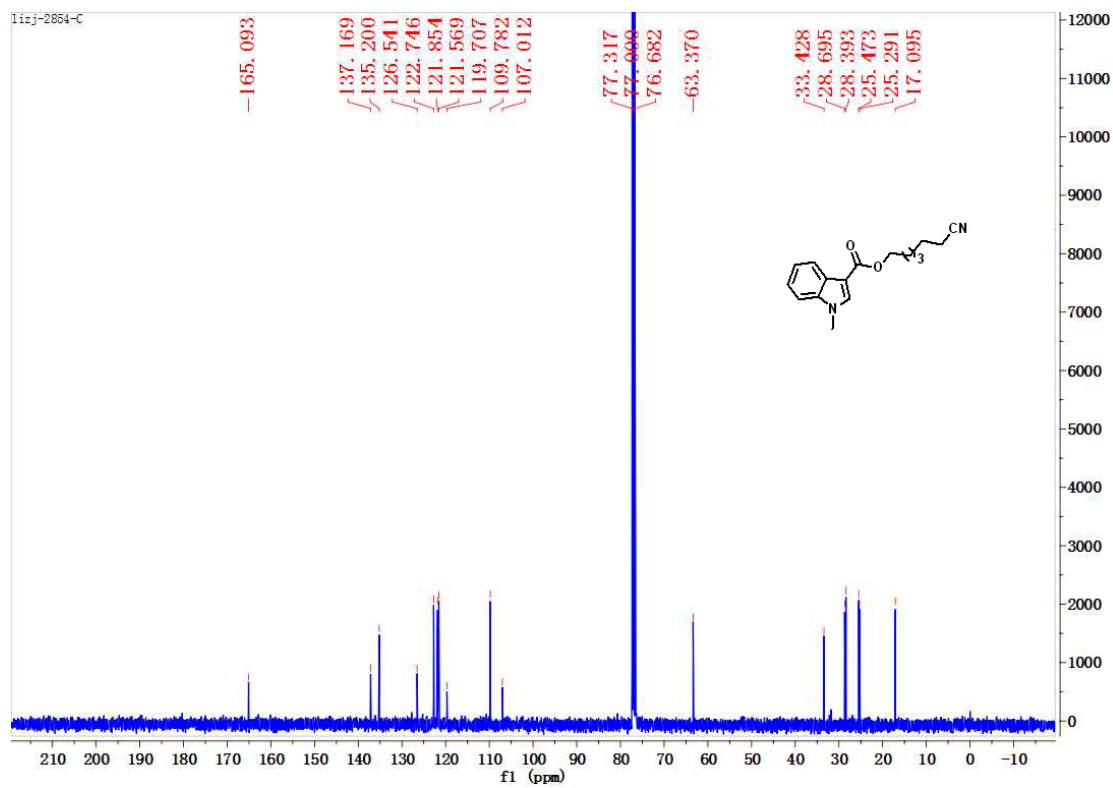

# 10-<sup>1</sup>H NMR

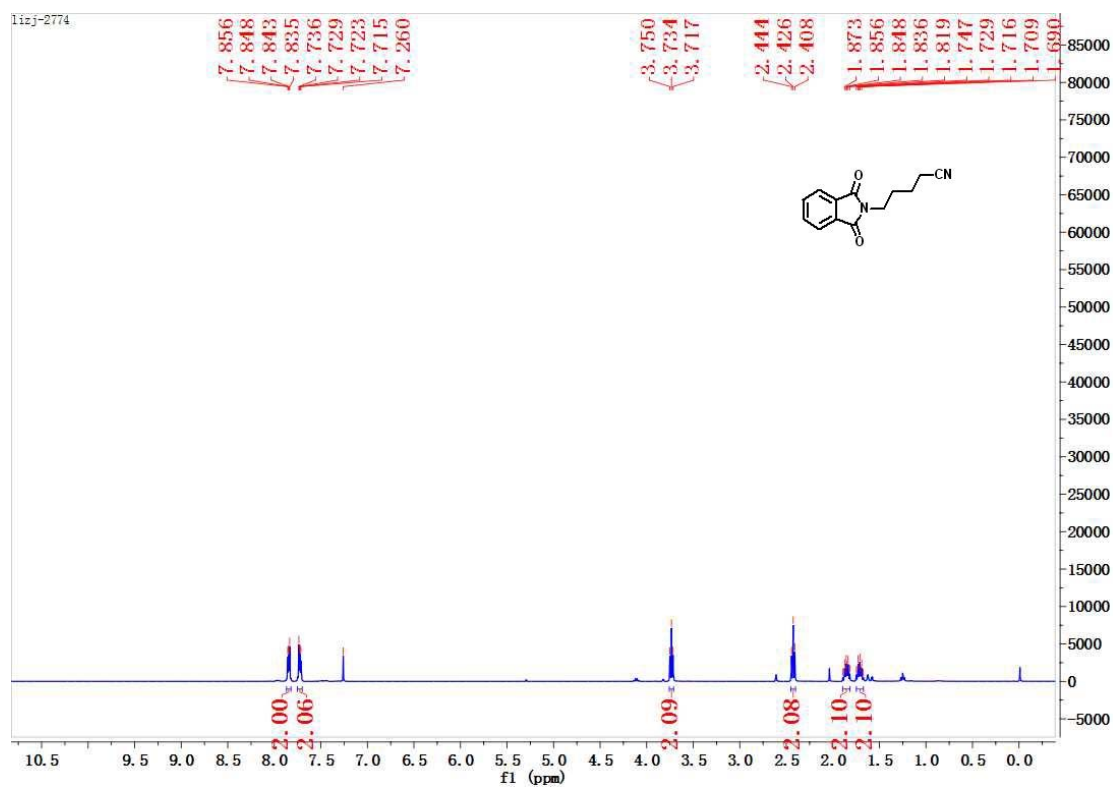

# 10-<sup>13</sup>C NMR

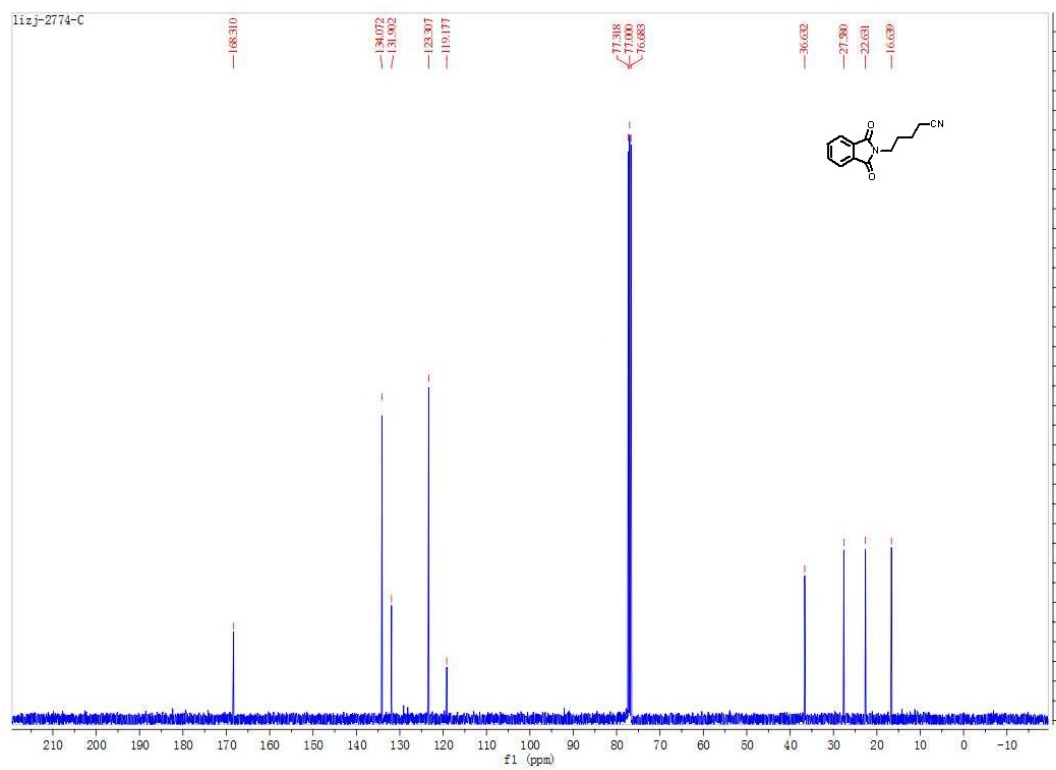

# 11-<sup>1</sup>H NMR

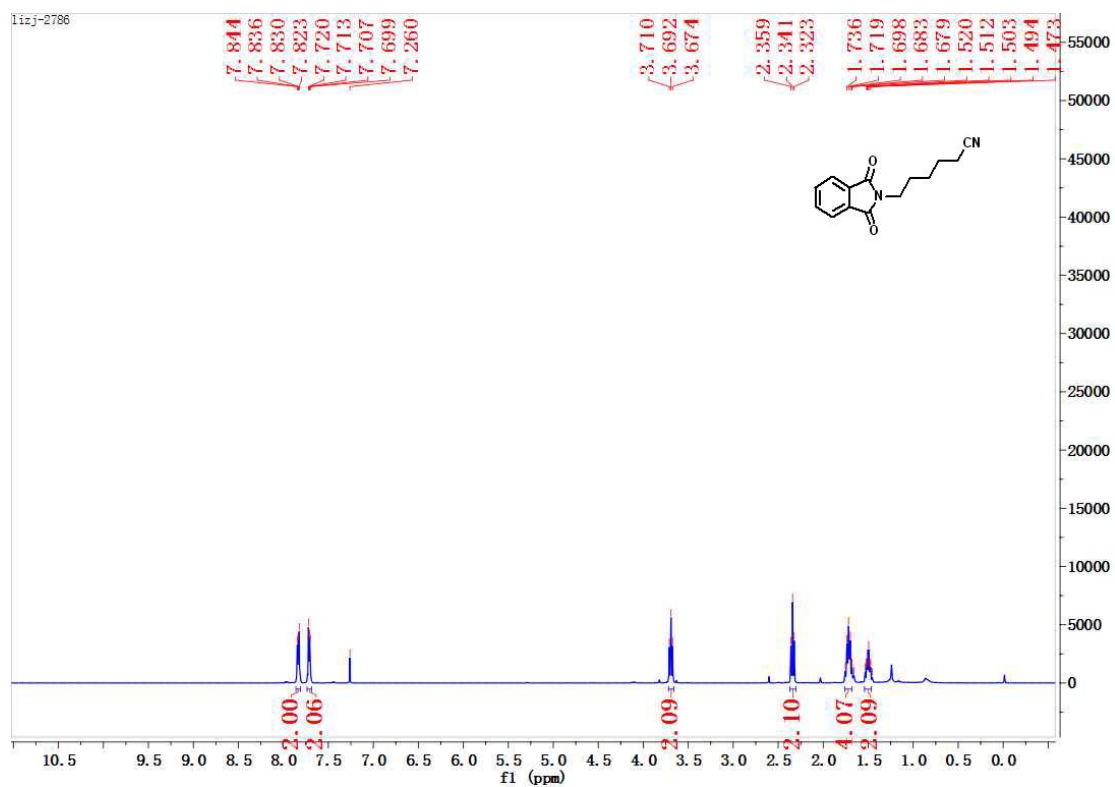

# 11-<sup>13</sup>C NMR

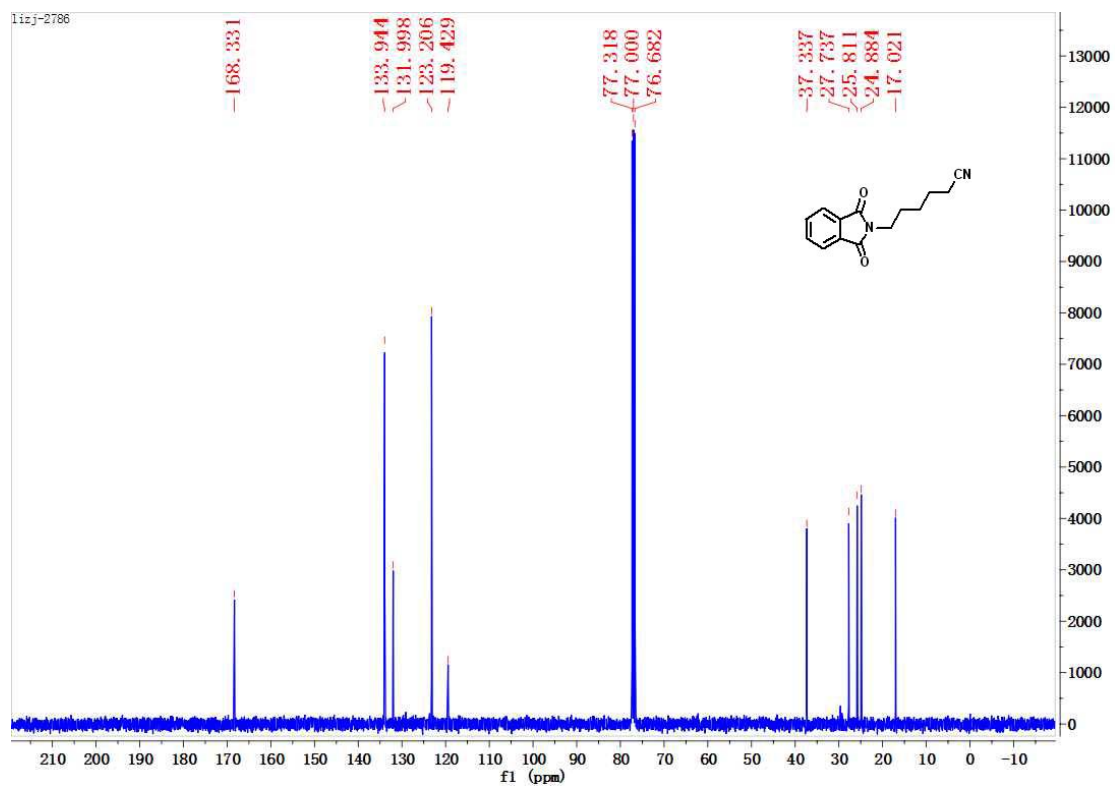

## 12-<sup>1</sup>H NMR

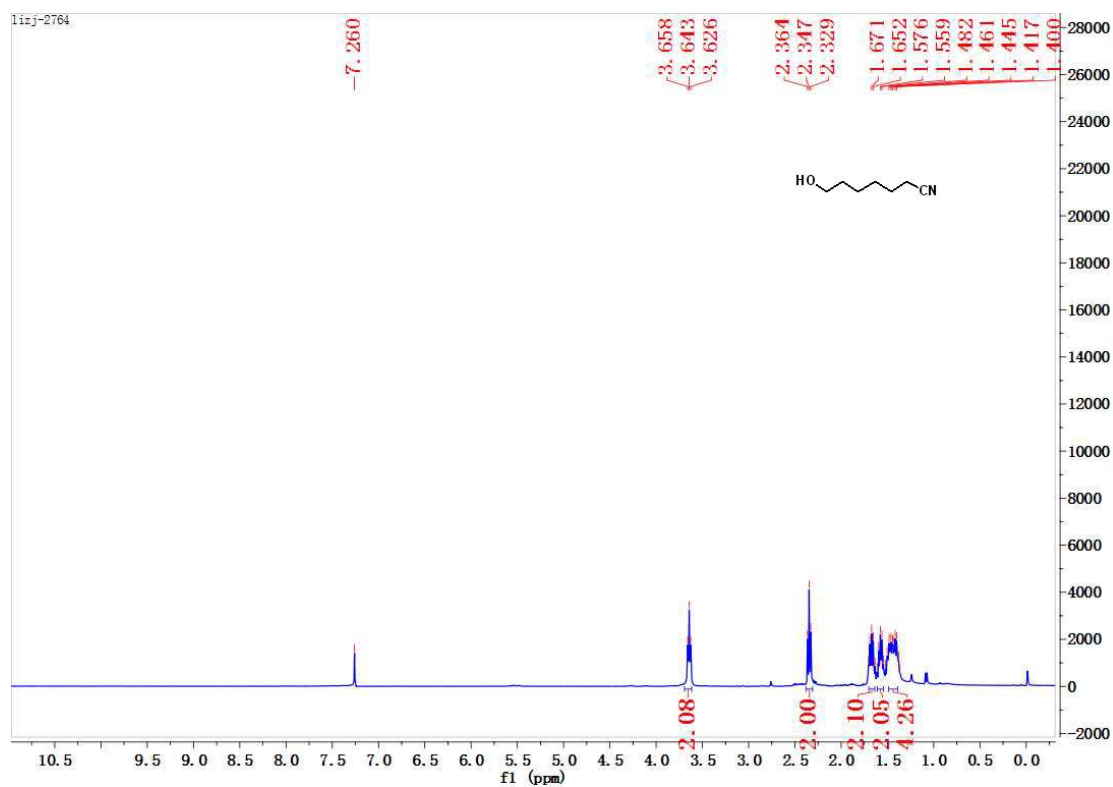

## 12-<sup>13</sup>C NMR

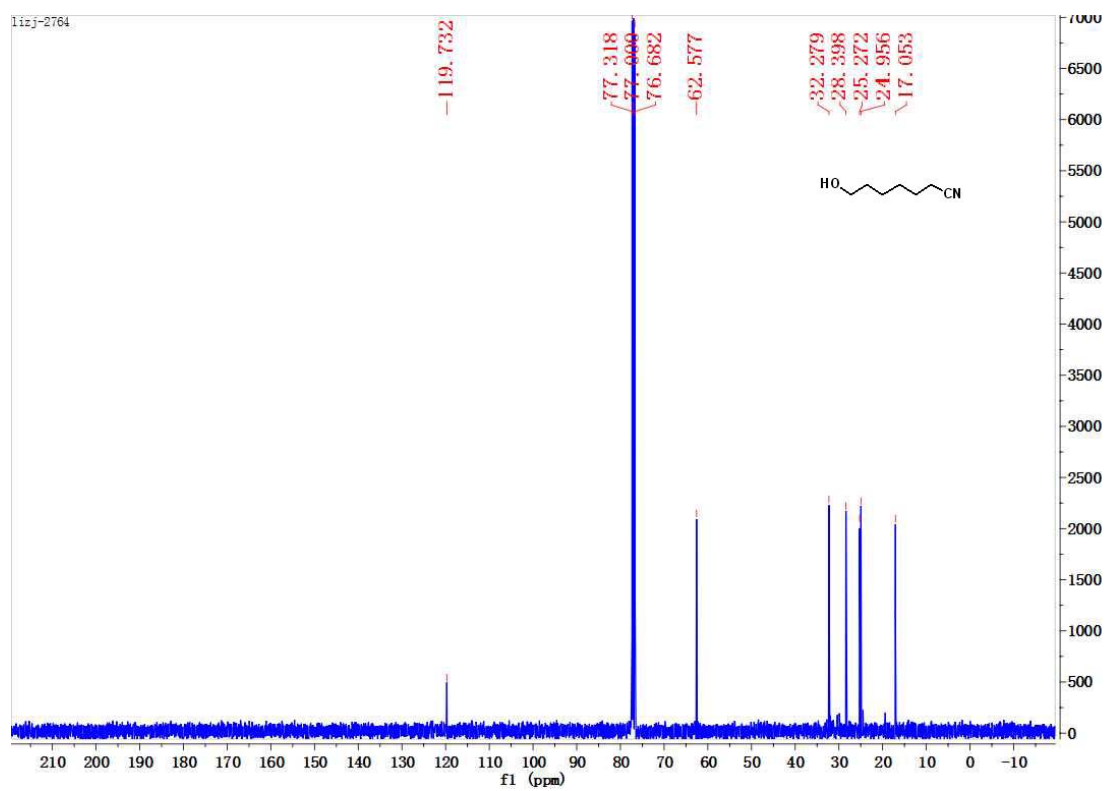

### 13-<sup>1</sup>H NMR

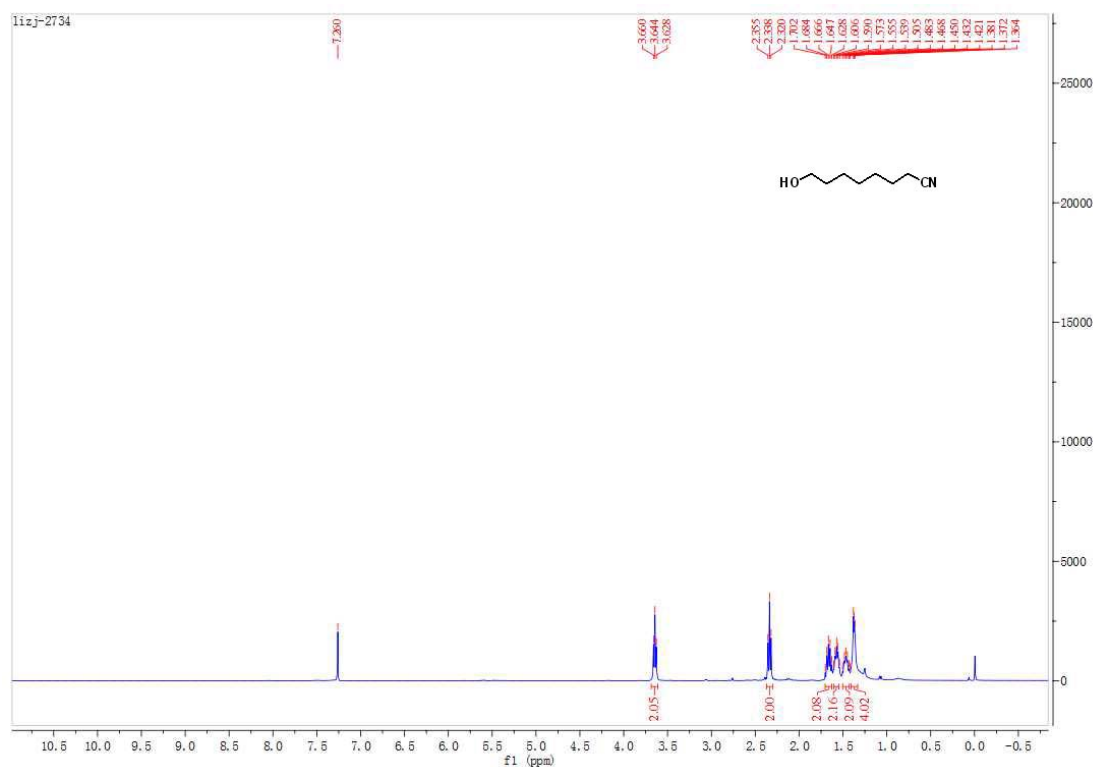

### 13-<sup>13</sup>C NMR

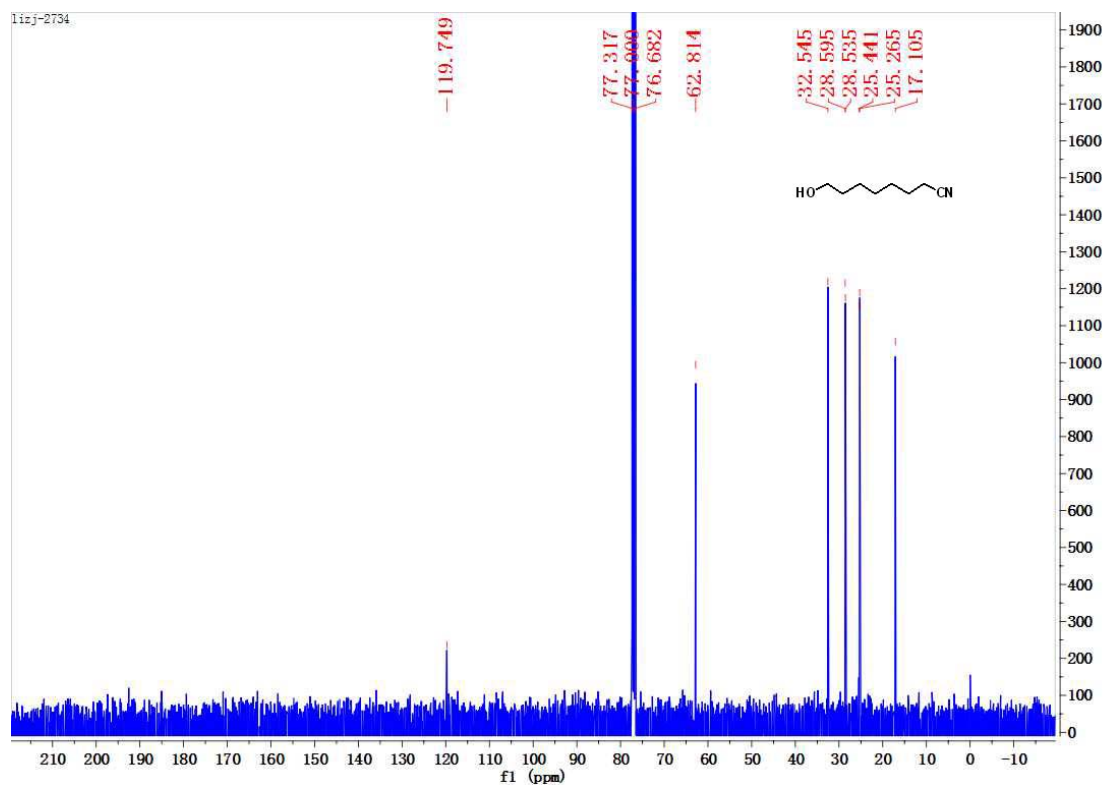

# 14-<sup>1</sup>H NMR

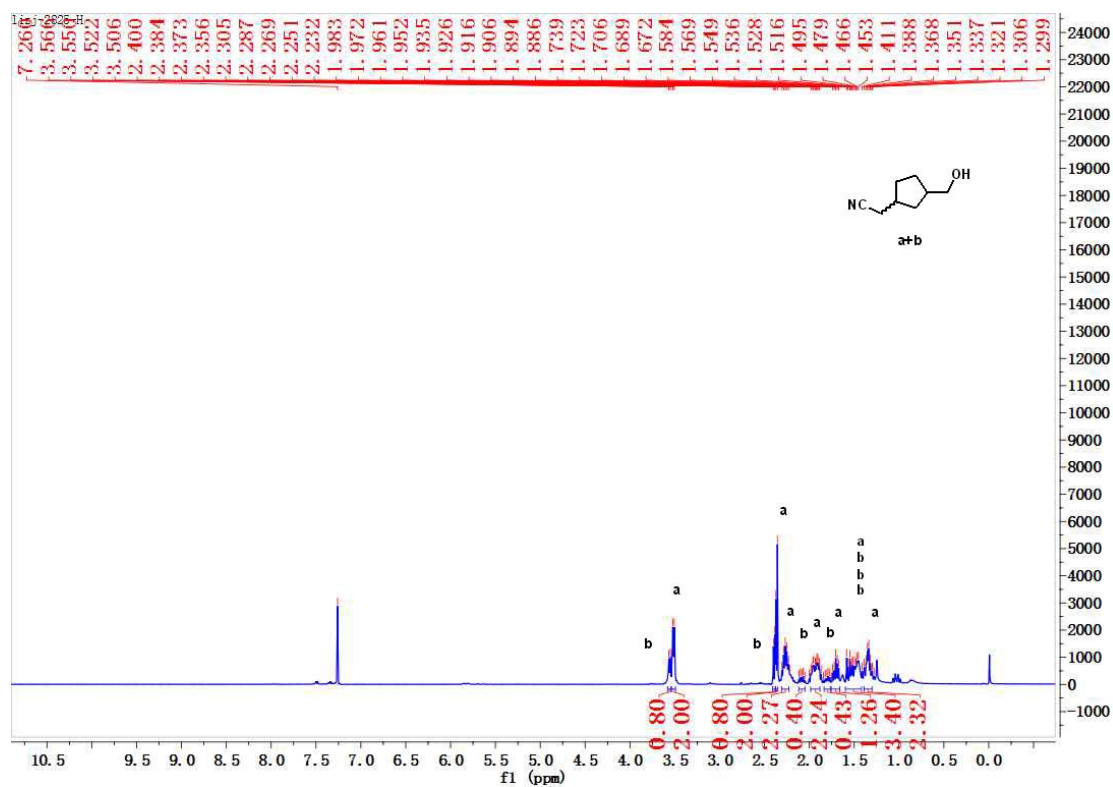

# 14-<sup>13</sup>C NMR

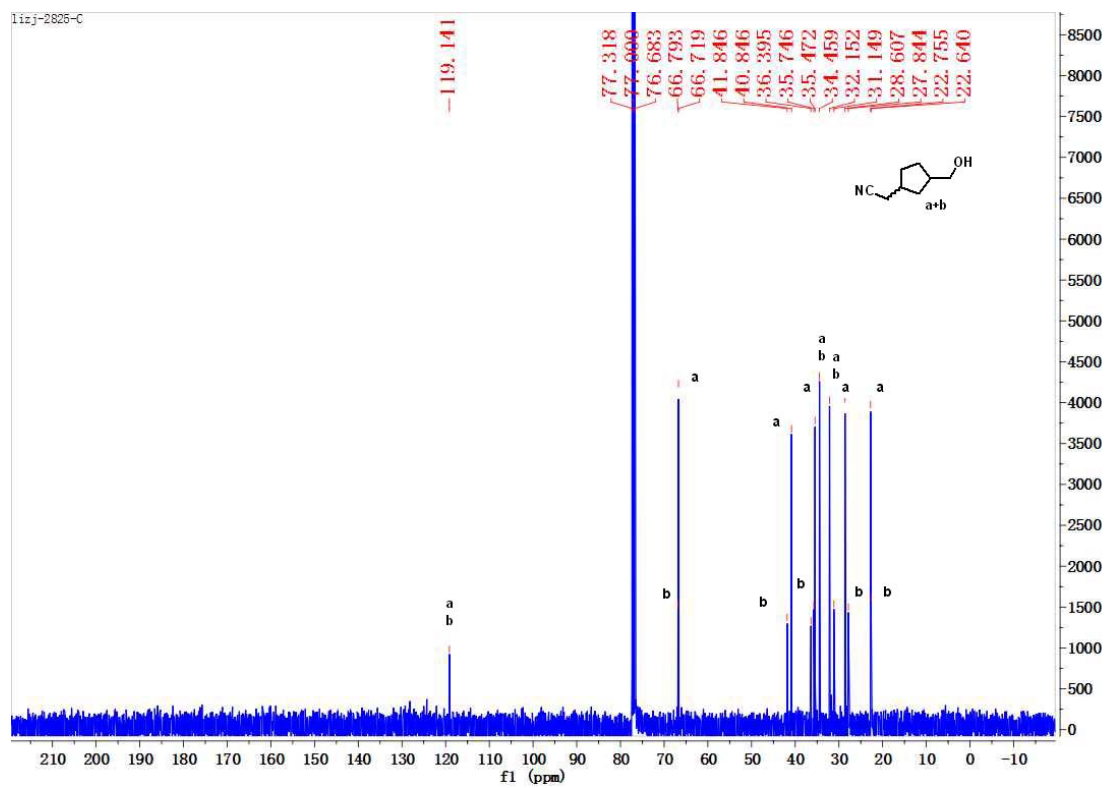



# 15-<sup>1</sup>H NMR

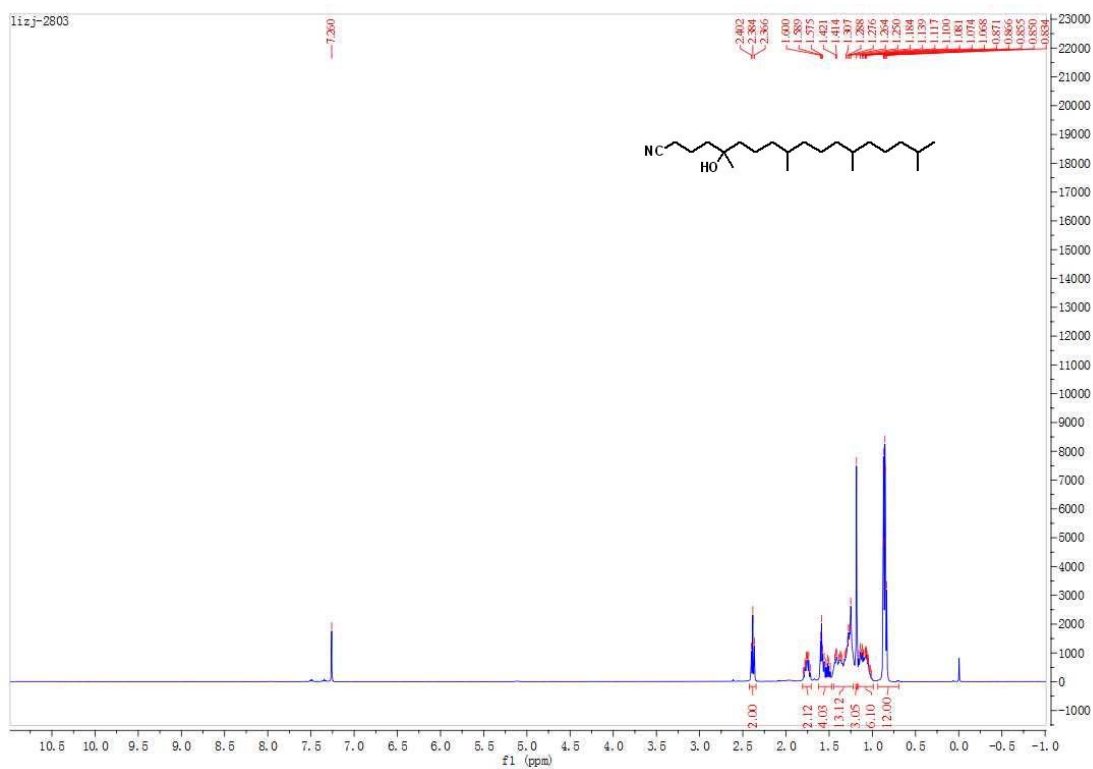

# 15-<sup>13</sup>C NMR

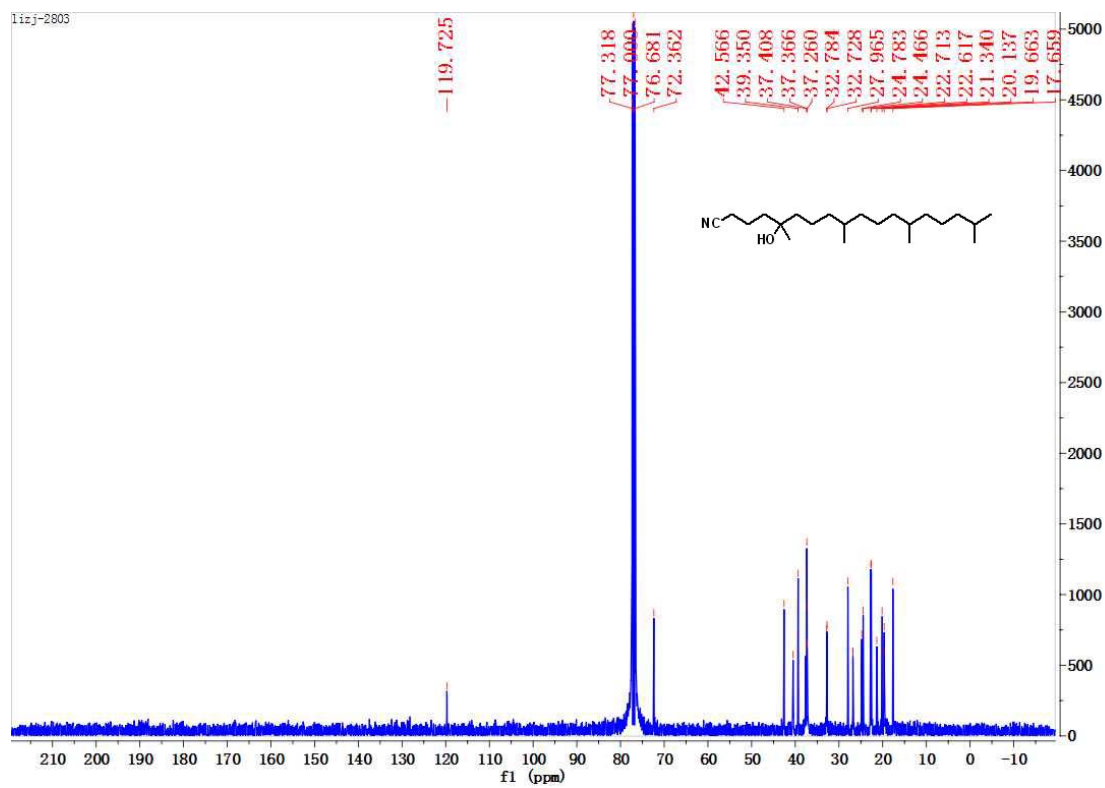

# 16-<sup>1</sup>H NMR

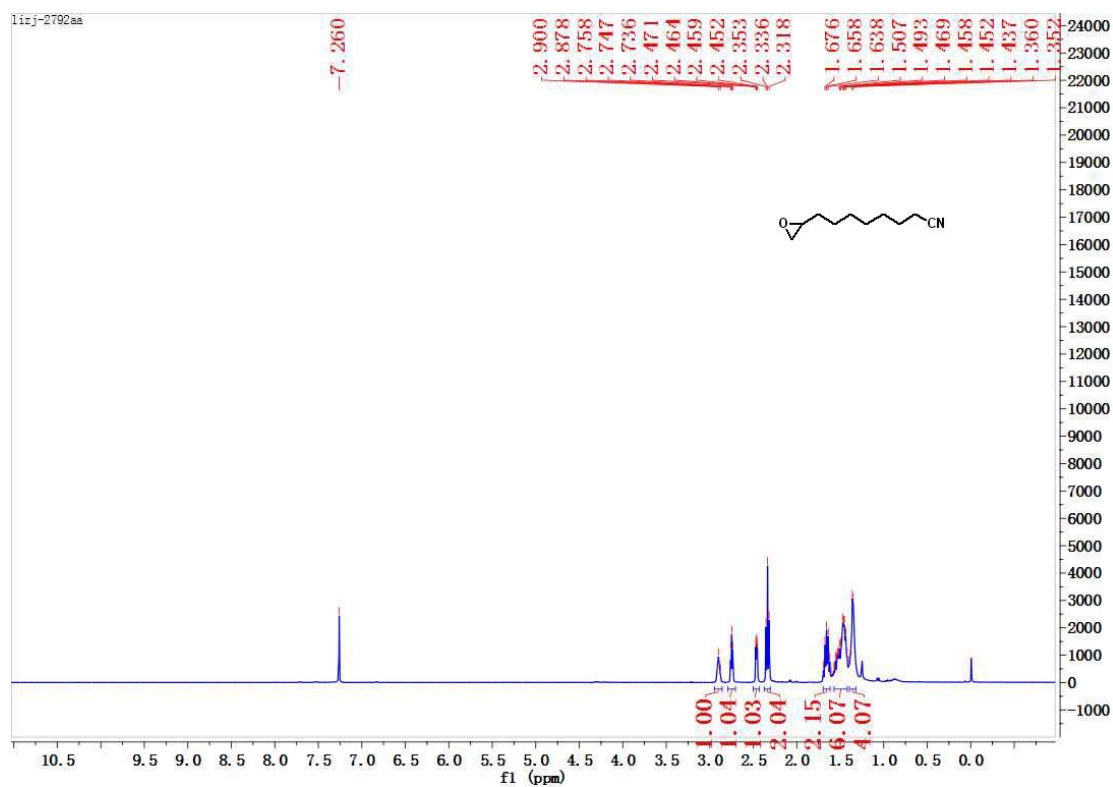

# 16-<sup>13</sup>C NMR

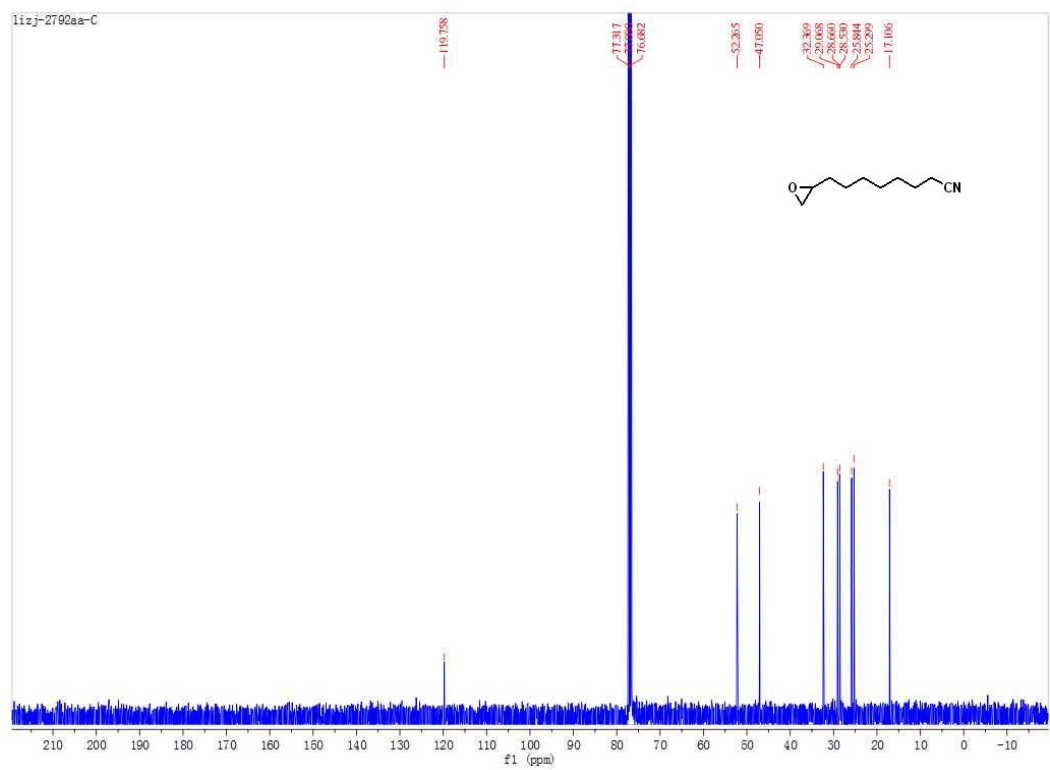

# 17-<sup>1</sup>H NMR

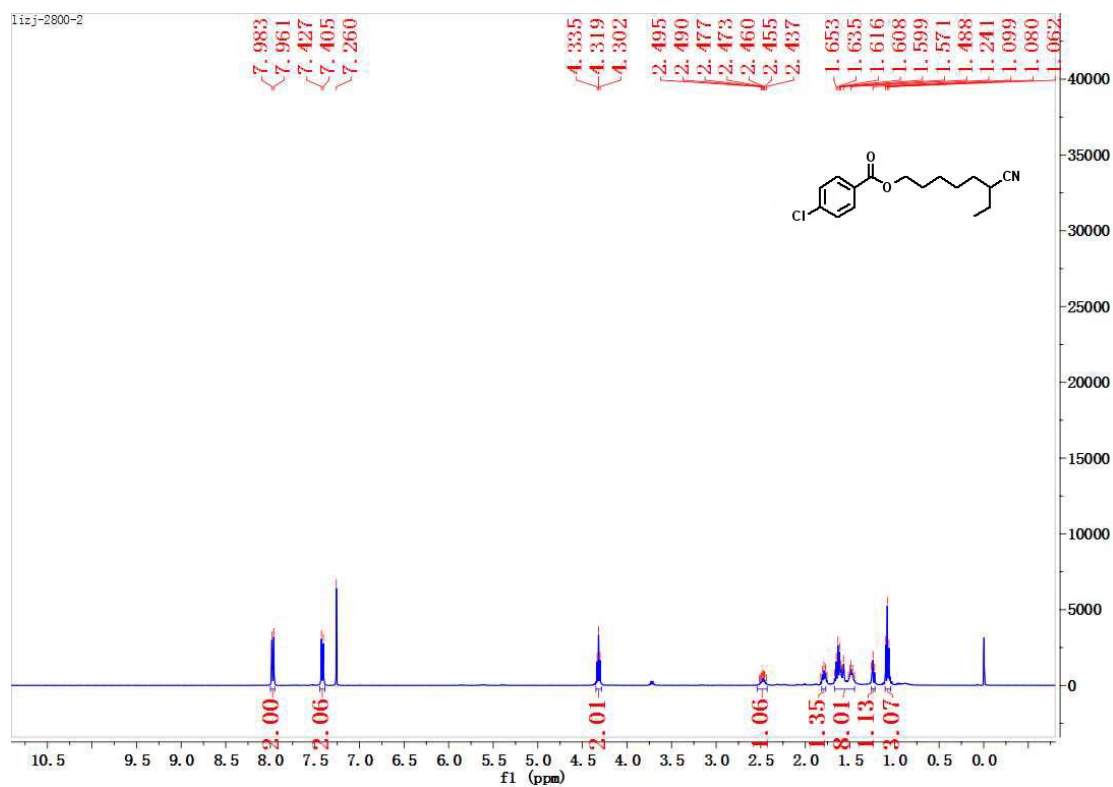

# 17-<sup>13</sup>C NMR

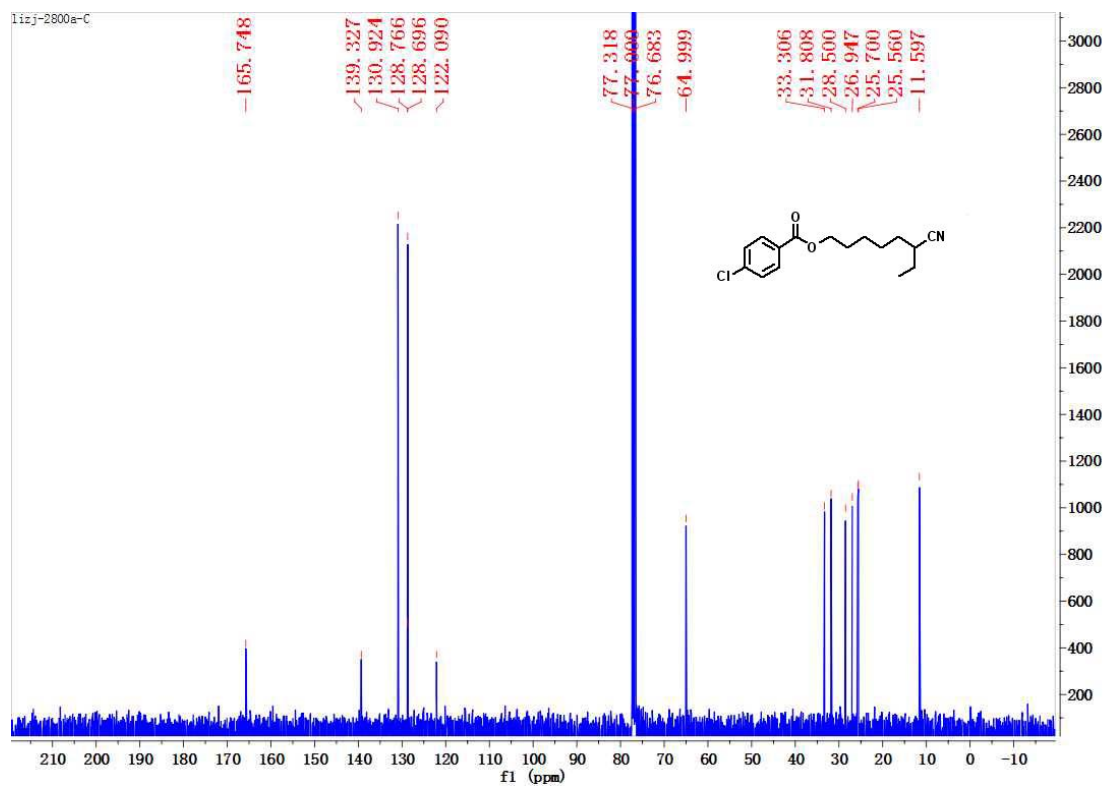

## 18-<sup>1</sup>H NMR

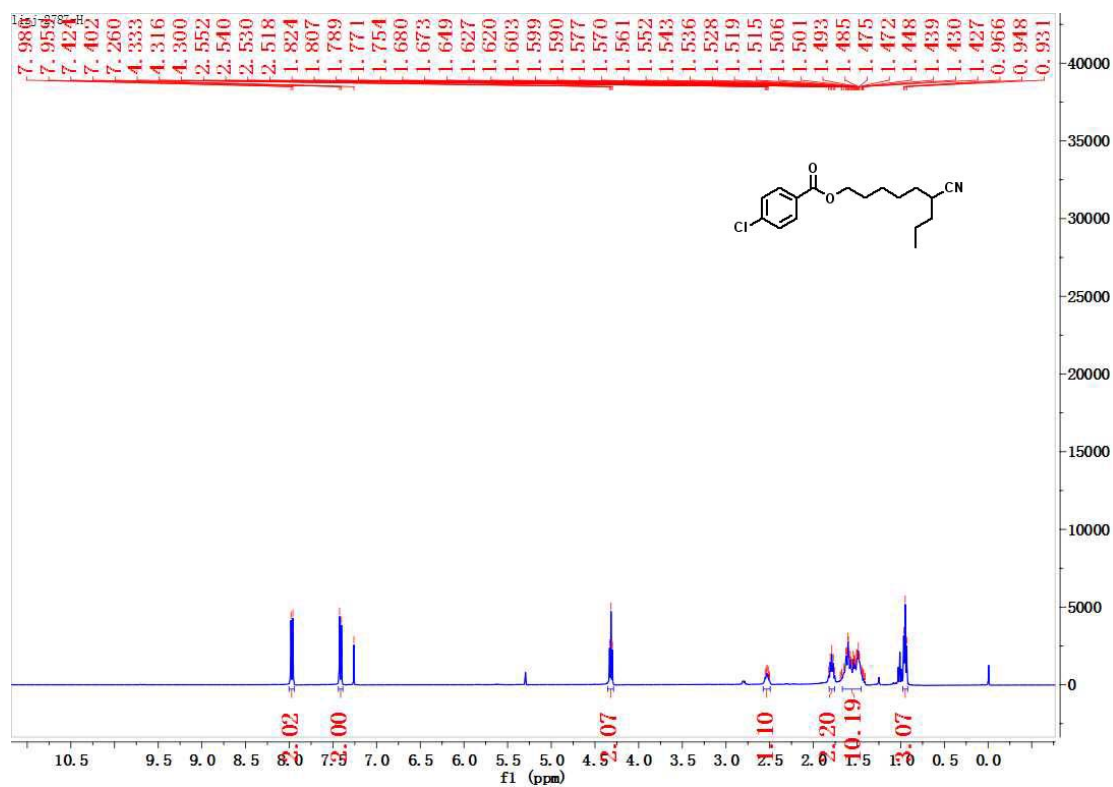

## 18-<sup>13</sup>C NMR

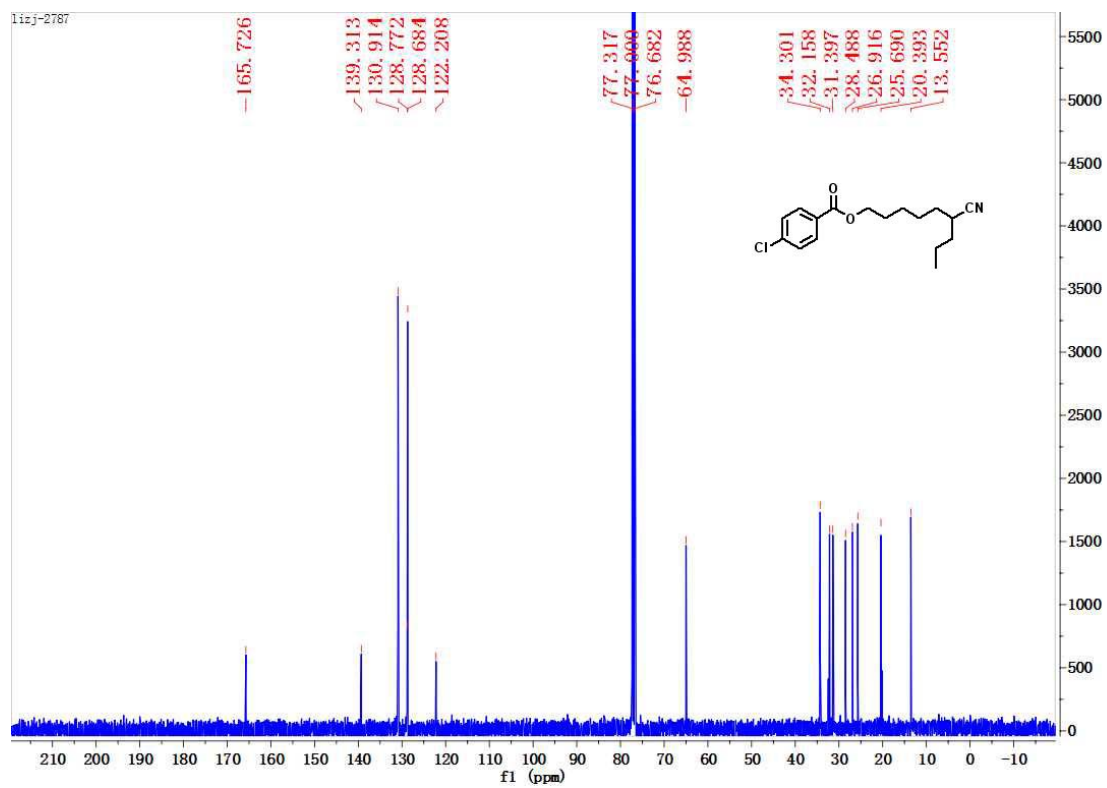

## 19-<sup>1</sup>H NMR

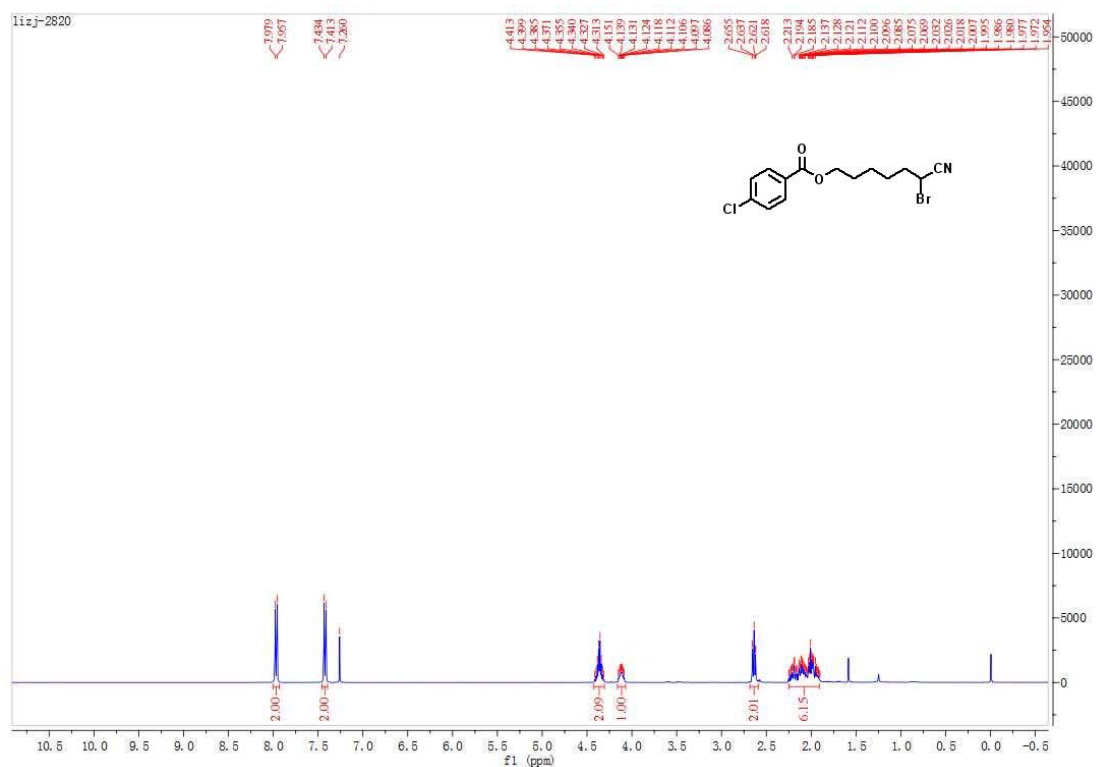

## 19-<sup>13</sup>C NMR

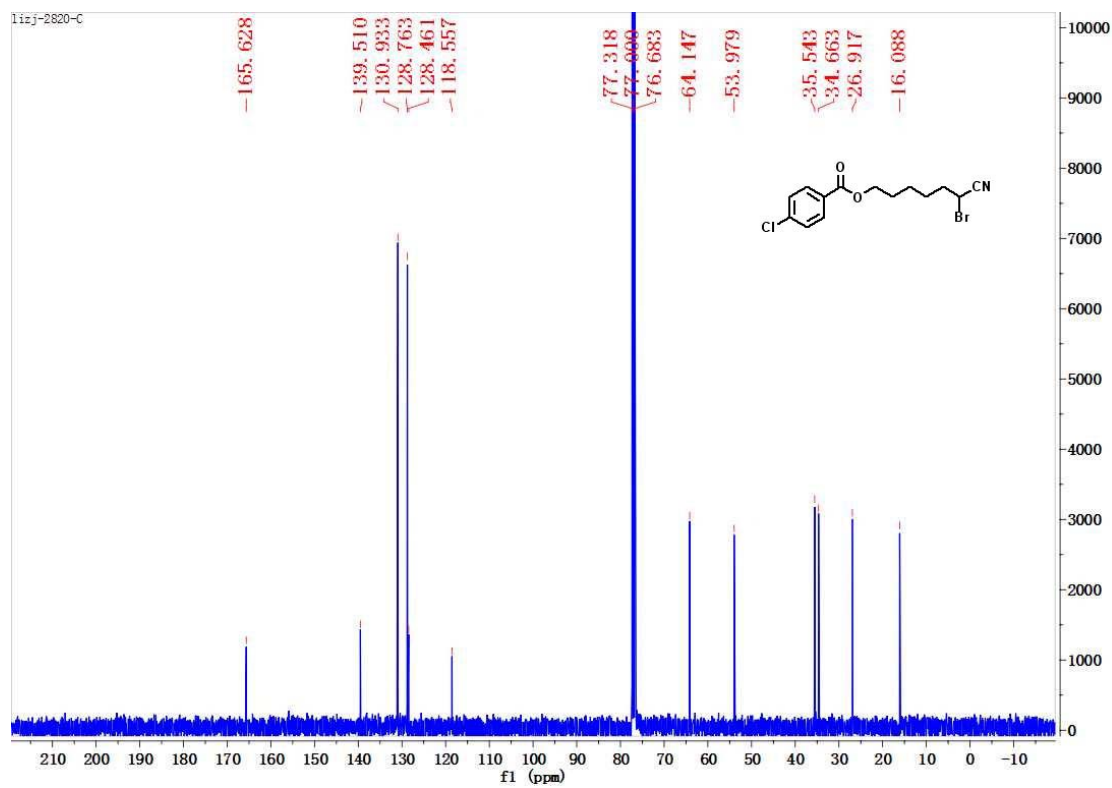

## 20-<sup>1</sup>H NMR

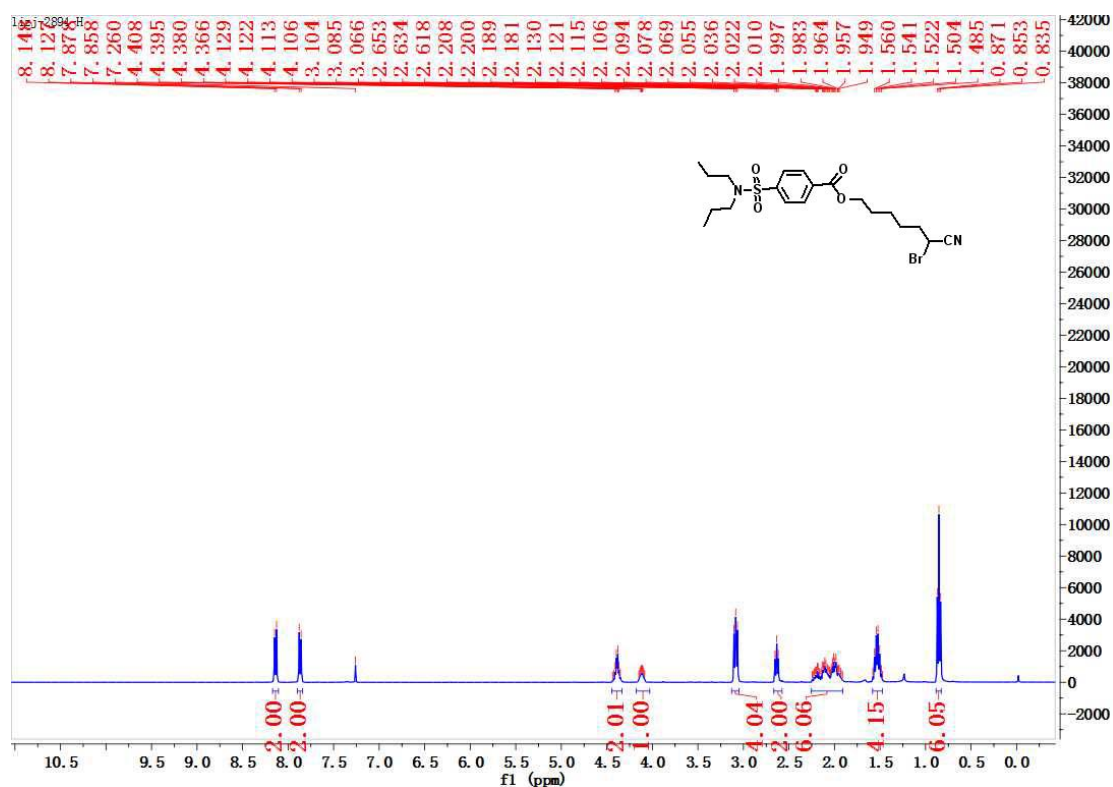

## 20-<sup>13</sup>C NMR

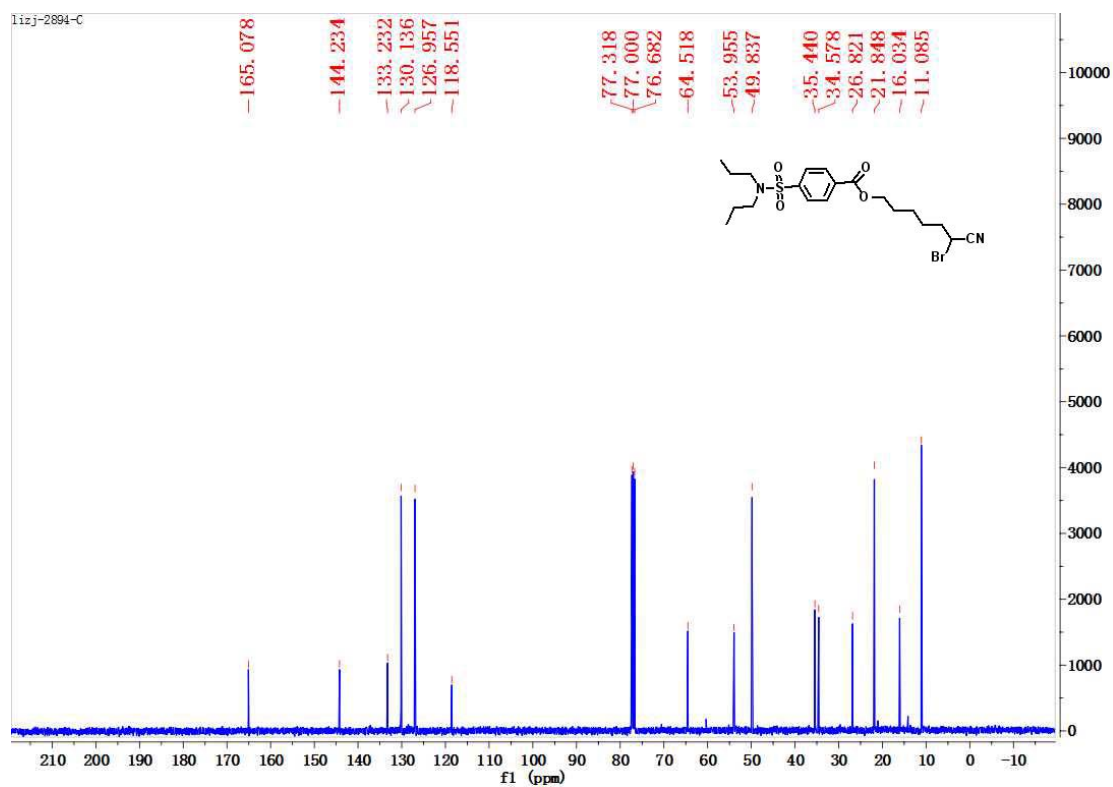

## 21-<sup>1</sup>H NMR

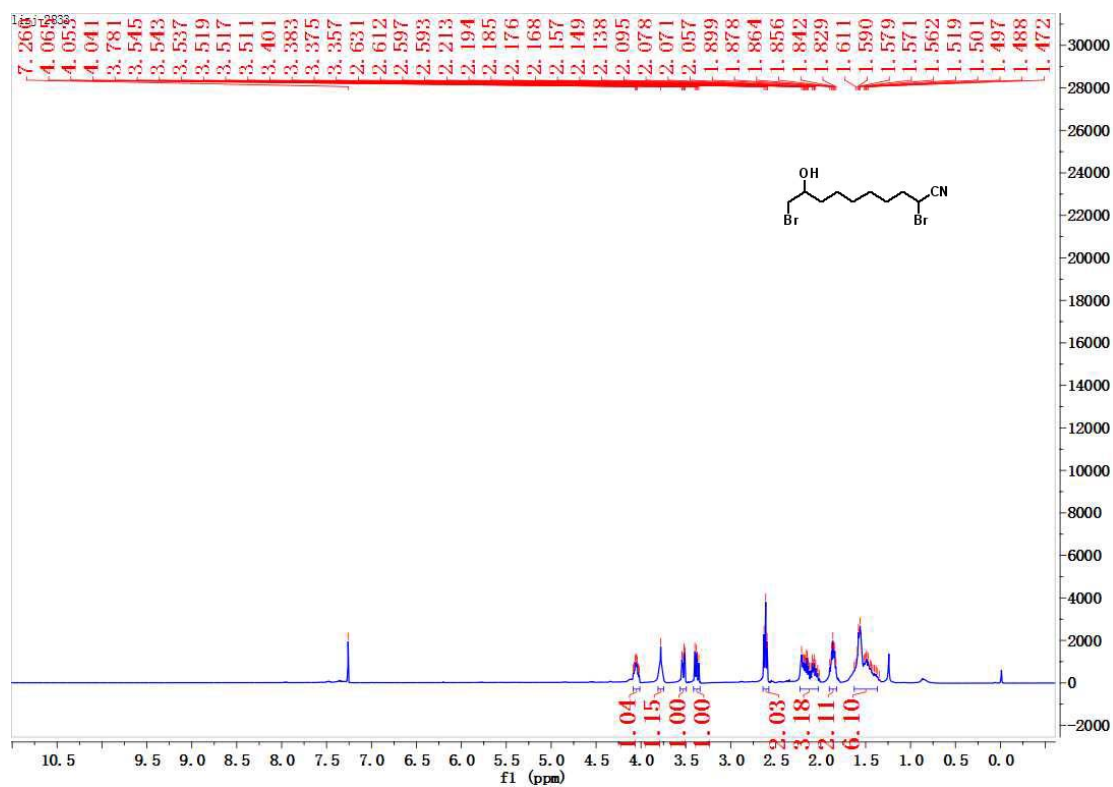

## 21-<sup>13</sup>C NMR

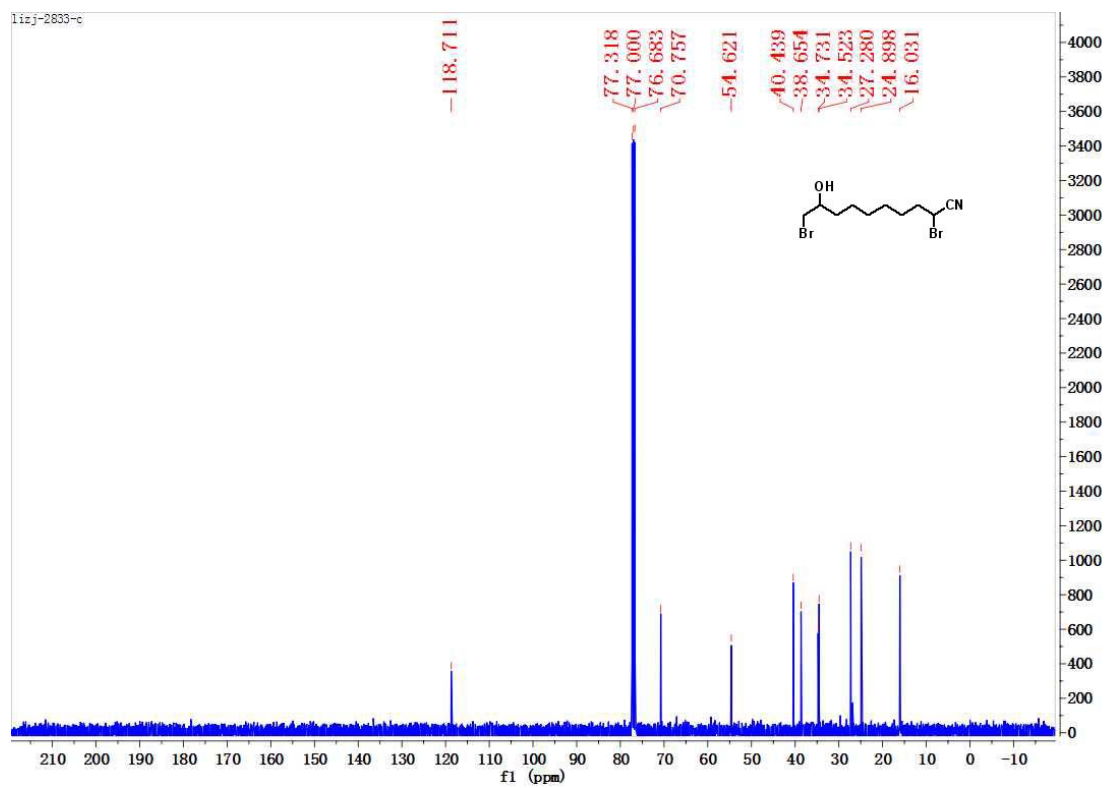

## 21-<sup>13</sup>DEPT

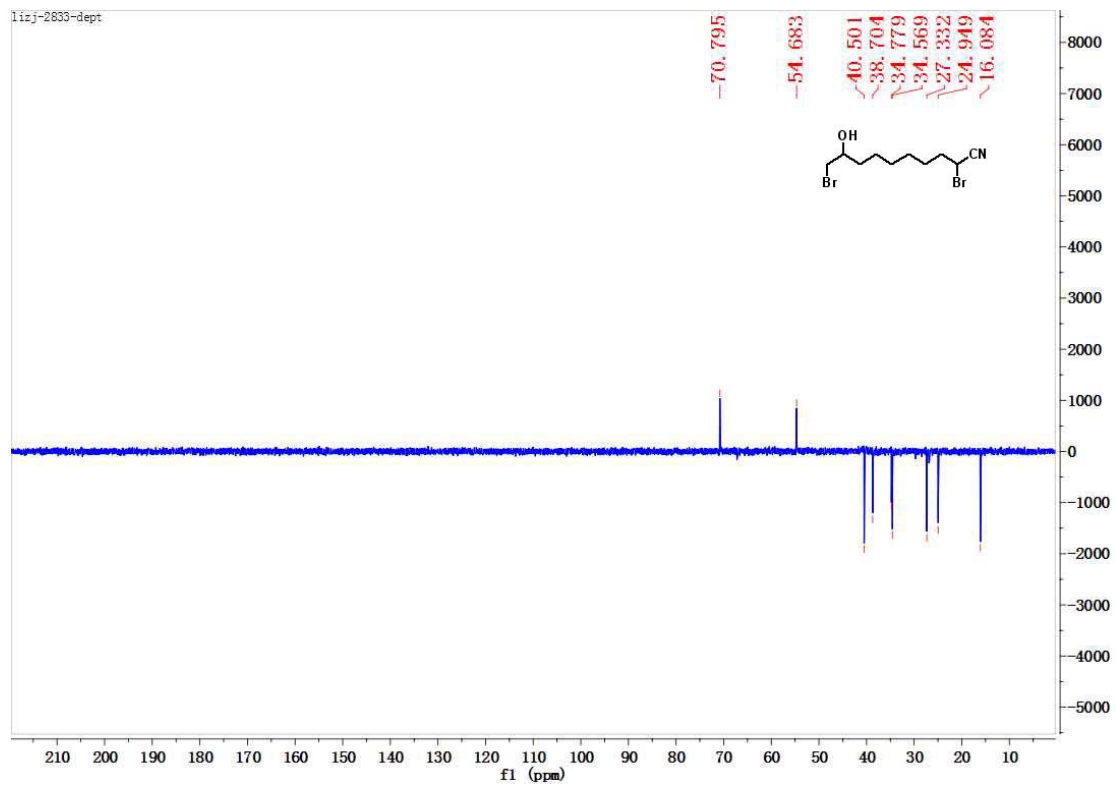

## 22-<sup>1</sup>H NMR

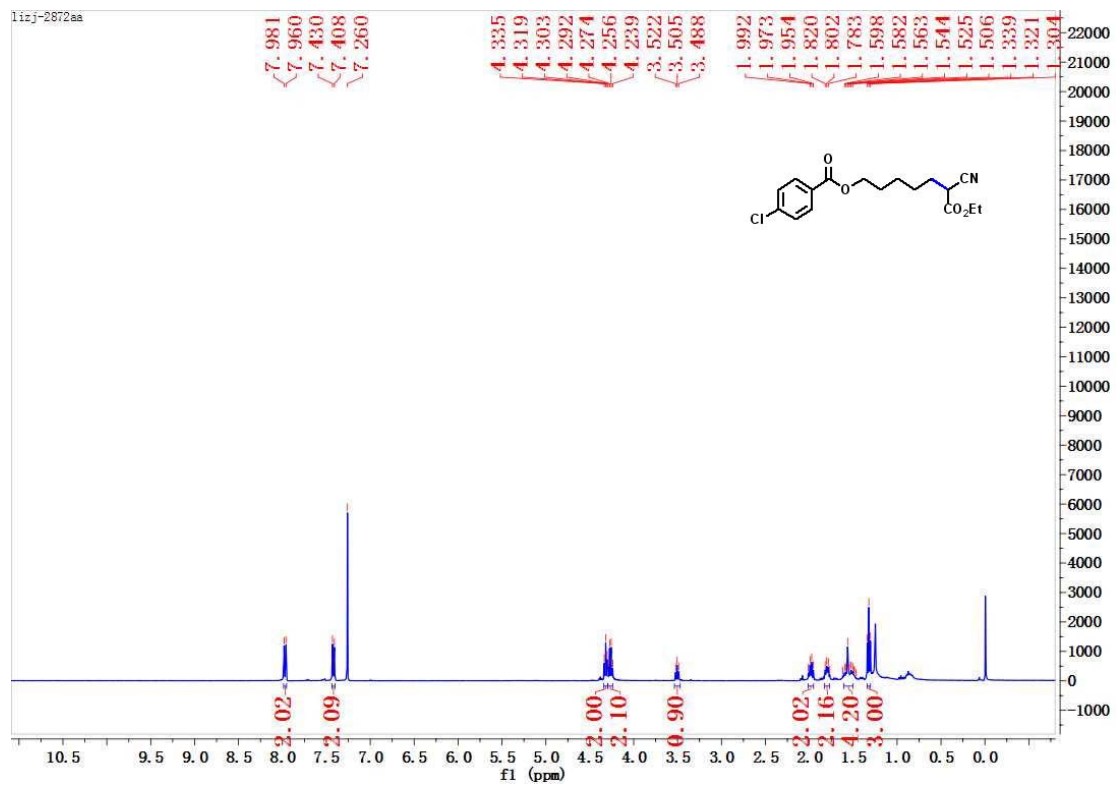



# 22-<sup>13</sup>C NMR

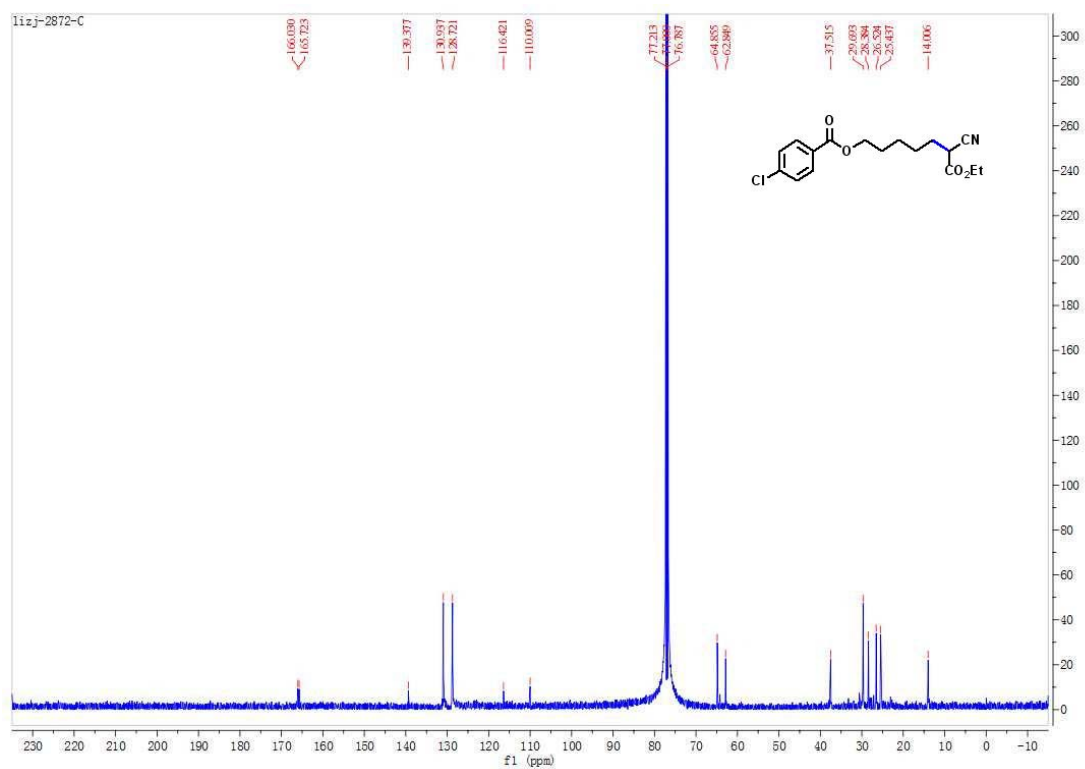

Supplement: c5cc02968f1.pdf [file c5cc02968f1.pdf]
